# Supplementary material for: Molecular Pathways and Pigments Underlying the Colors of the Pearl Oyster Pinctada margaritifera var. cumingii (Linnaeus 1758)
Source: MDPI journal article supplement (doi:10.3390/genes12030421), 2021-03-15

# Uroporphyrin I

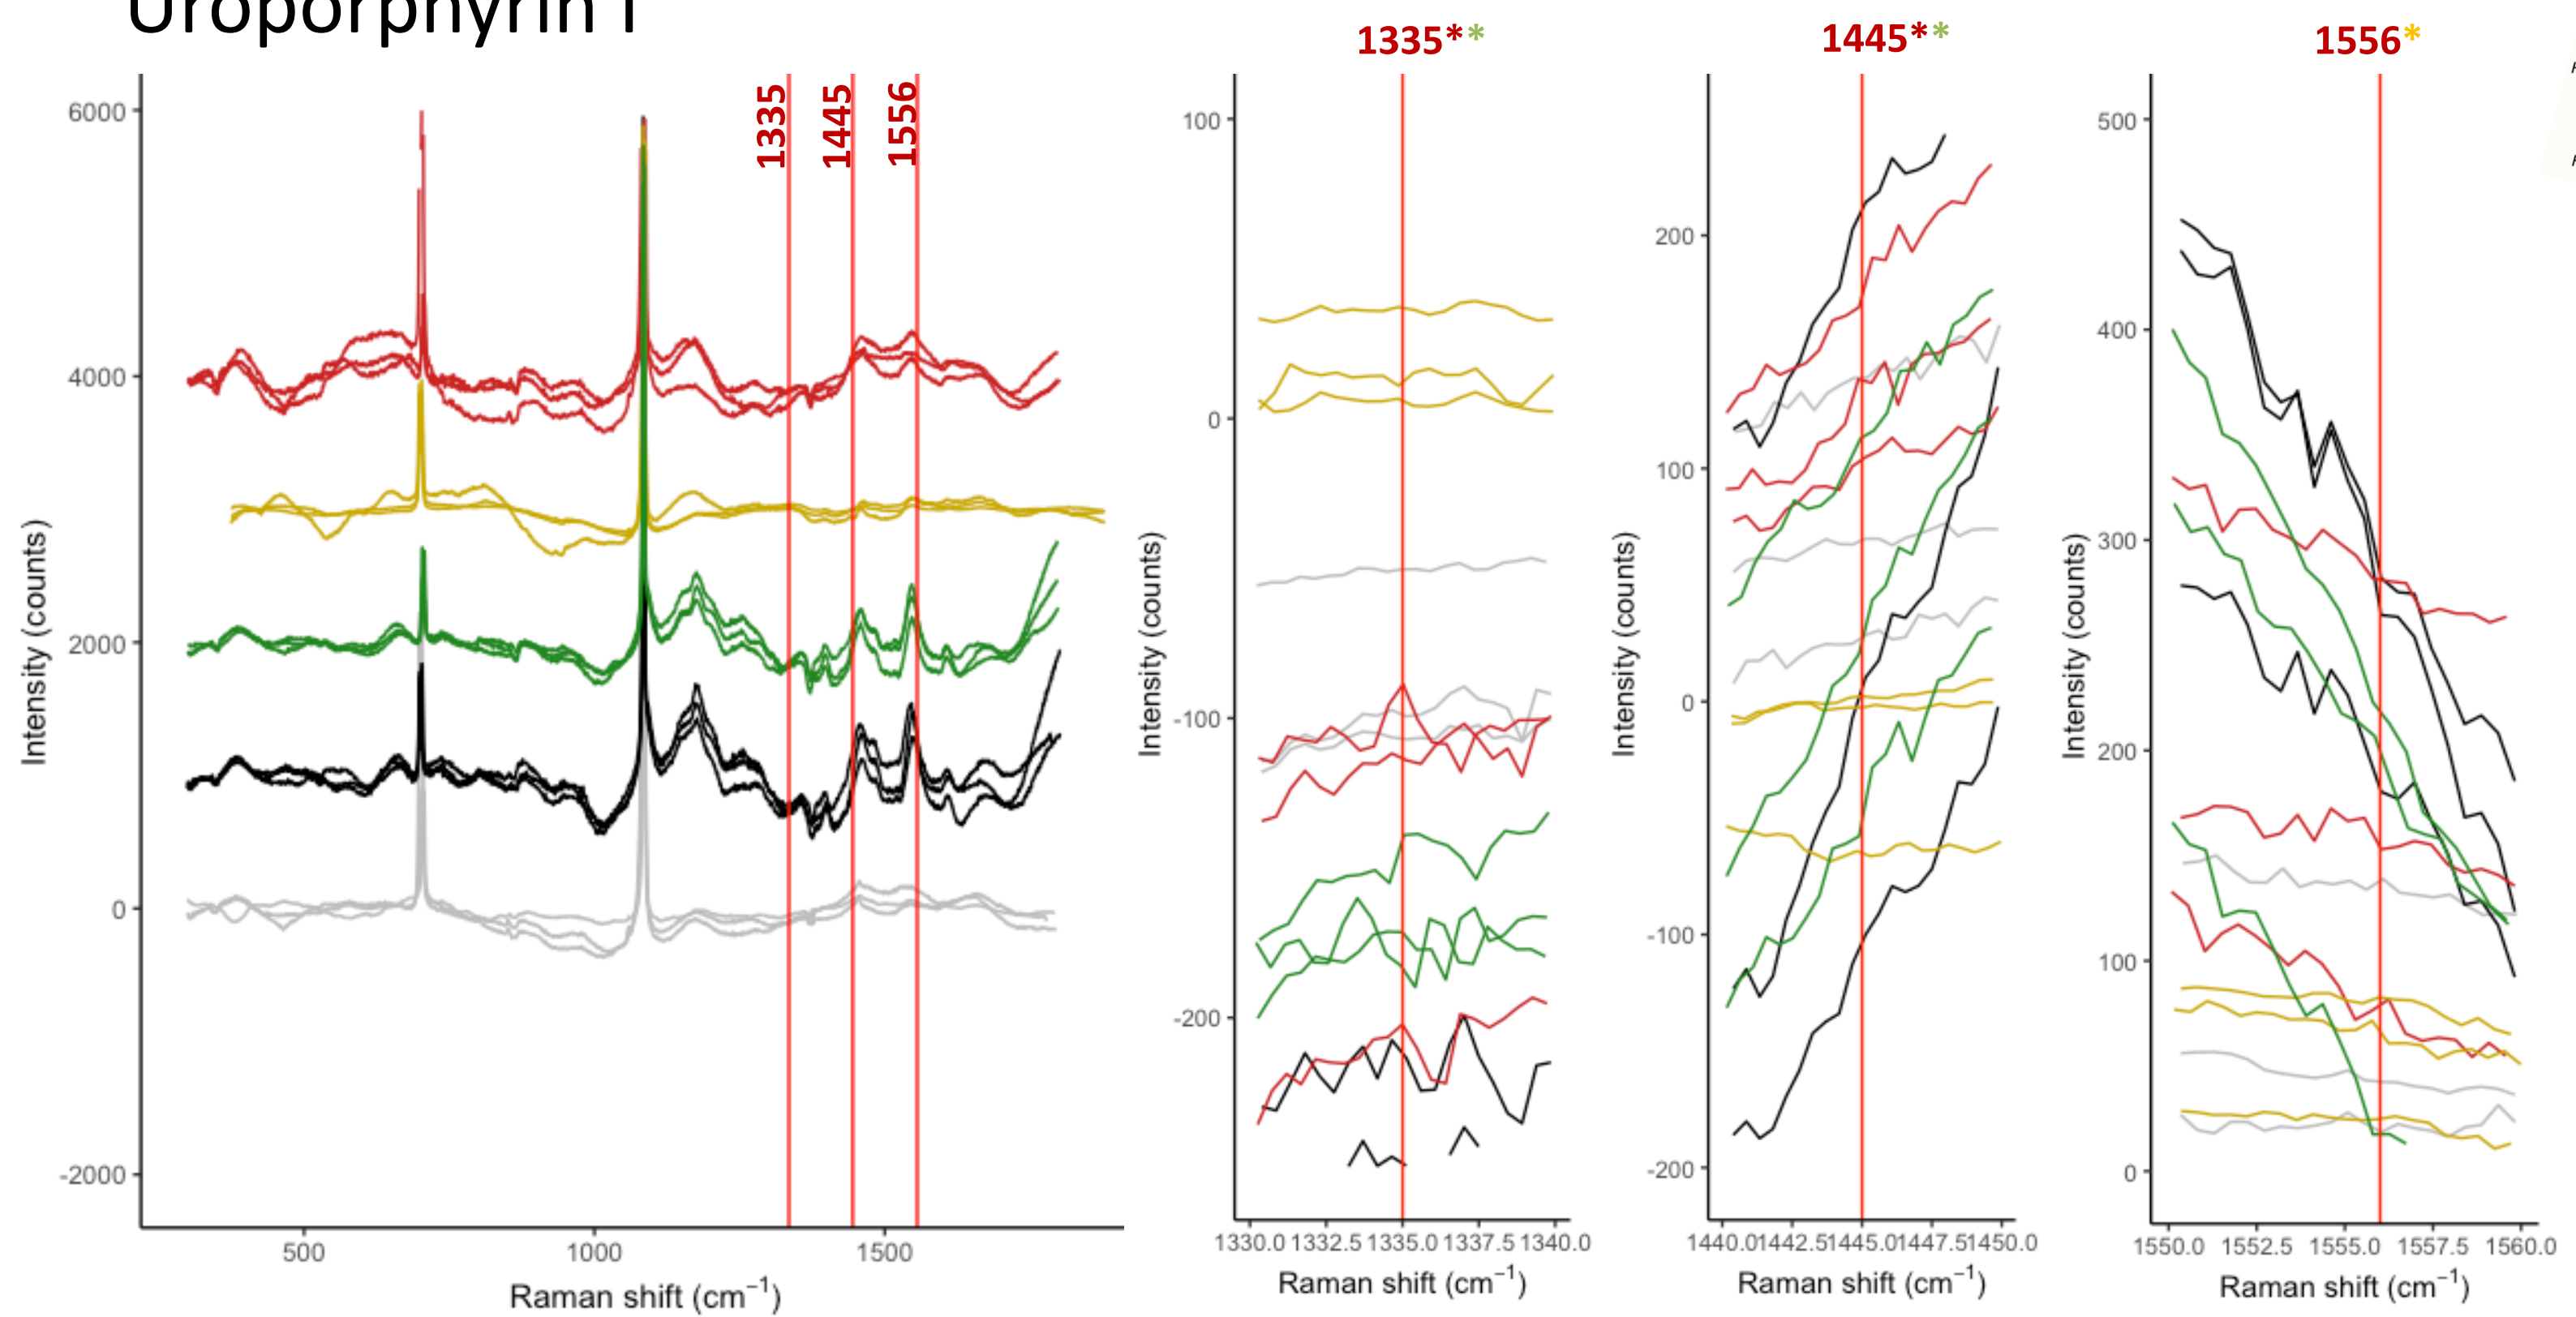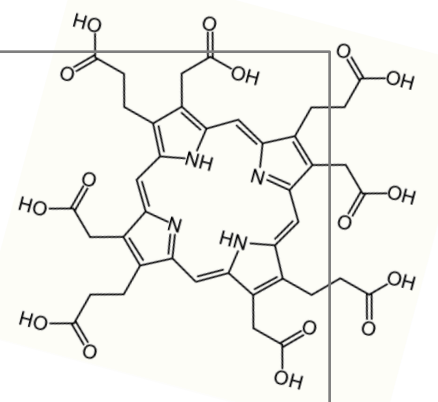

phenotype

— Albino\_1

— Albino\_2

— Albino\_3

— Black\_1

— Black\_2

— Black\_3

— Red\_1

— Red\_2

— Red\_3

— Yellow\_1

— Yellow\_2

— Yellow\_3

— Green\_1

— Green\_2

— Green\_3

# Copper-uroporphyrin

## Raman results

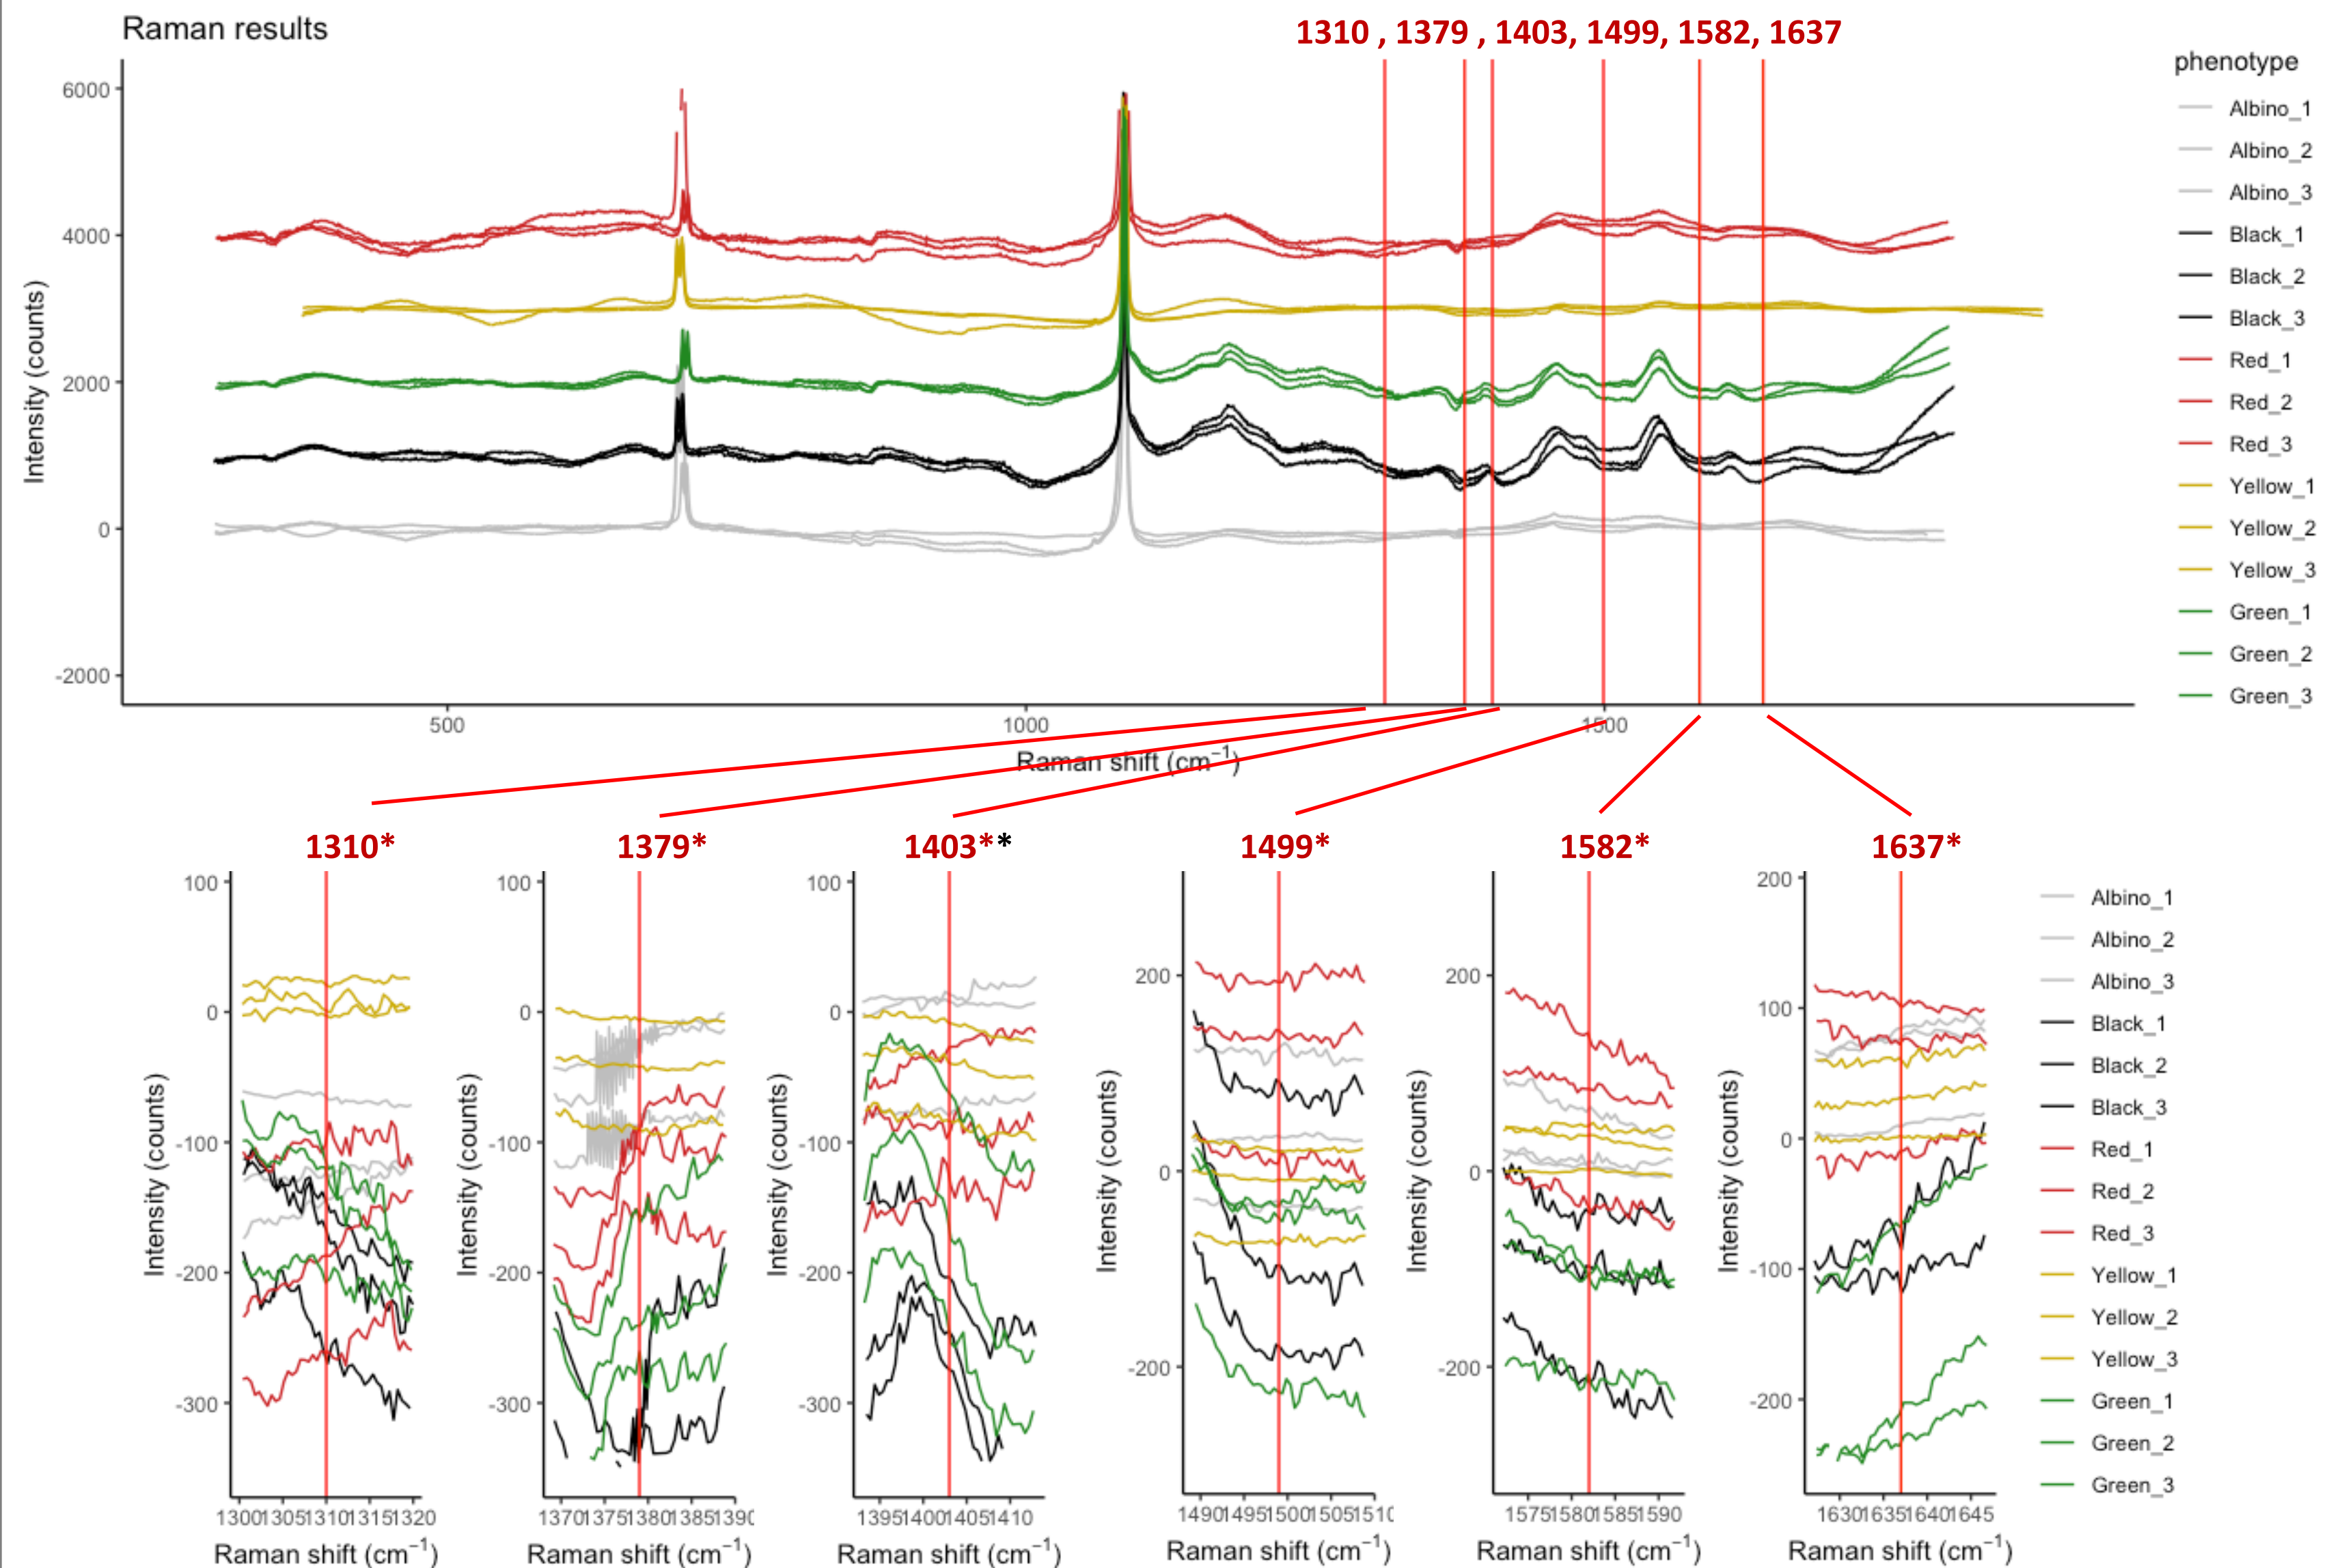

Supplement: s1 [file s1]
