# Supplementary material for: Molecular Pathways and Pigments Underlying the Colors of the Pearl Oyster Pinctada margaritifera var. cumingii (Linnaeus 1758)
Source: MDPI journal article supplement (doi:10.3390/genes12030421), 2021-03-15

# Cobalamin

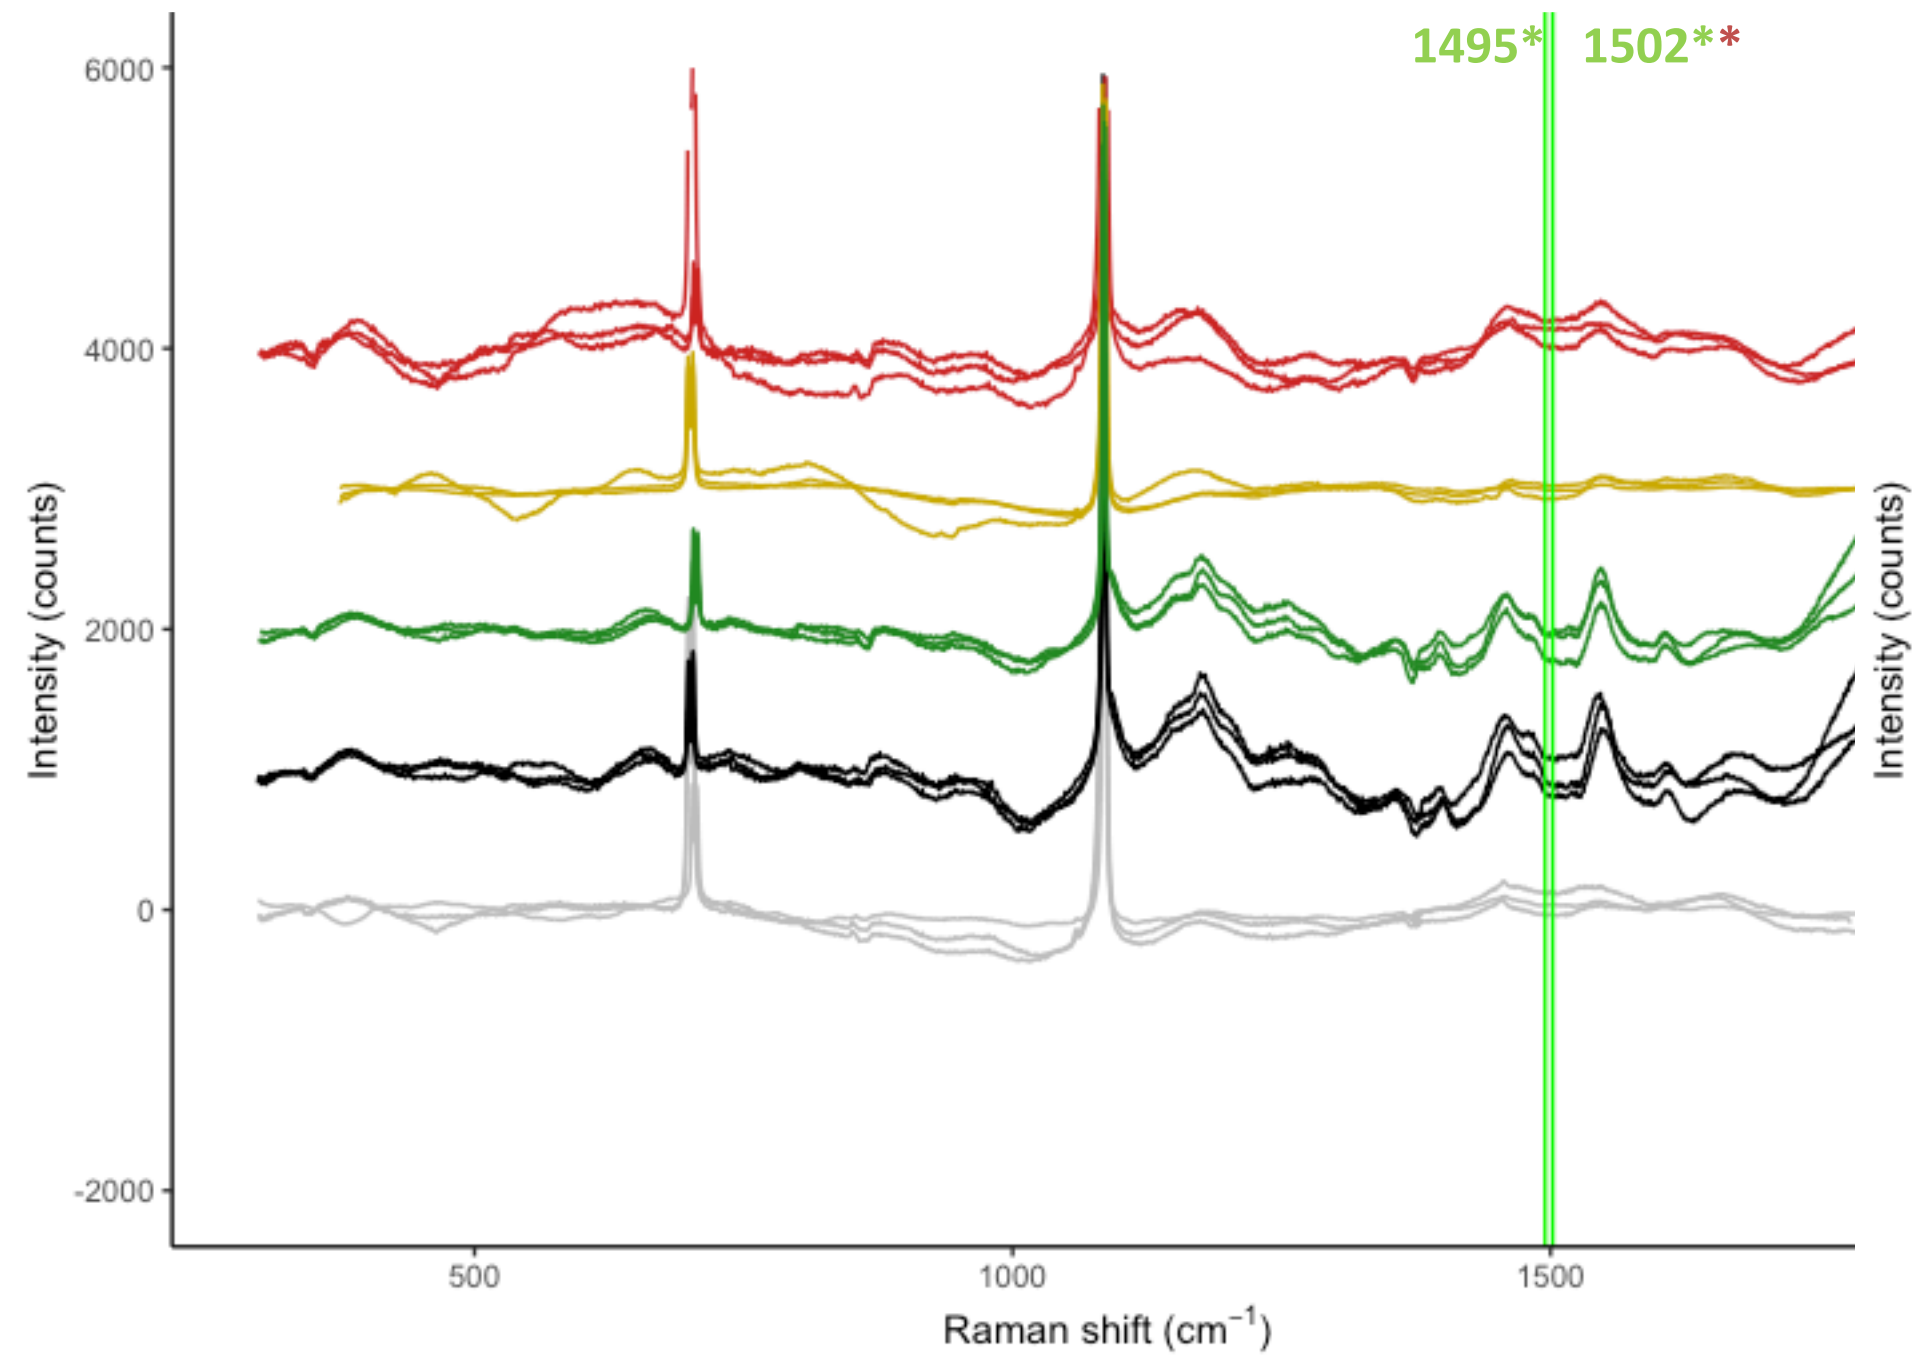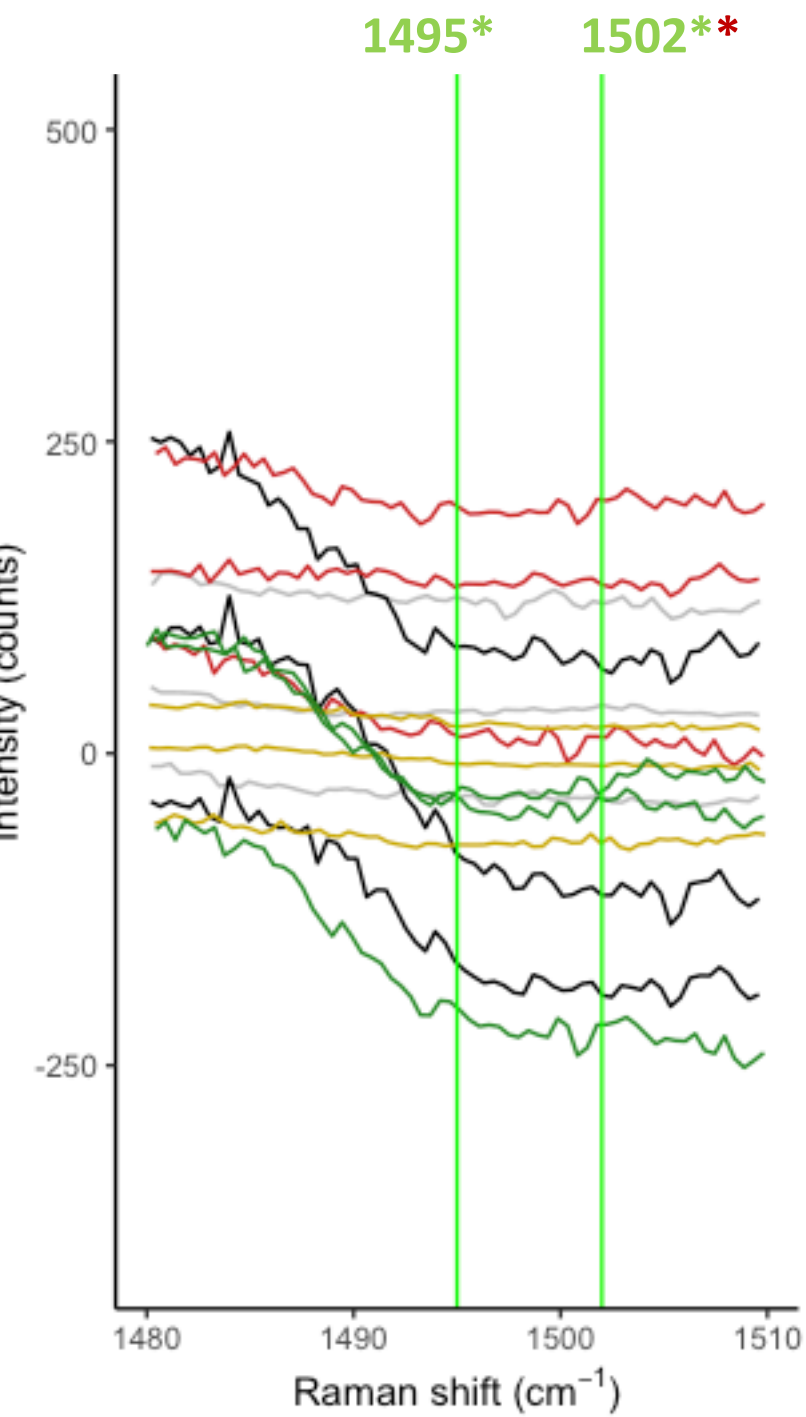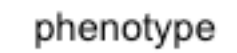

- Albino\_1  
— Albino\_2  
— Albino\_3  
— Black\_1  
— Black\_2  
— Black\_3  
— Red\_1  
— Red\_2  
— Red\_3  
— Yellow\_1  
— Yellow\_2  
— Yellow\_3  
— Green\_1  
— Green\_2  
— Green\_3

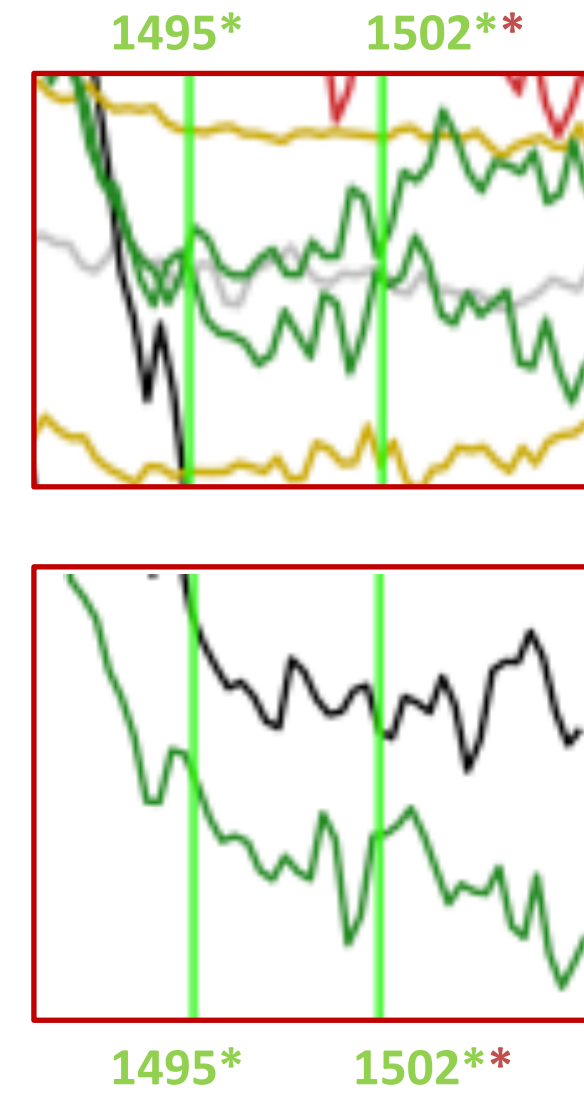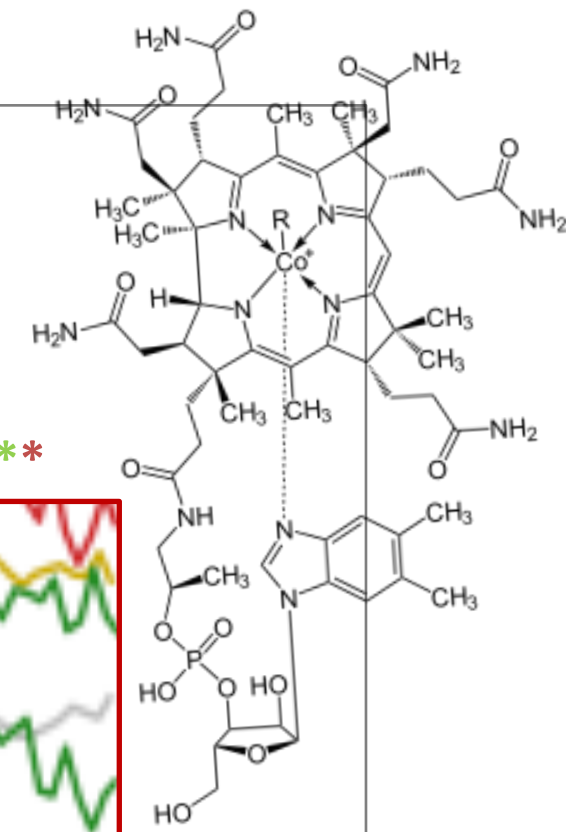

Supplement: s1 [file s1]
