# Supplementary figures and images for: Molecular Pathways and Pigments Underlying the Colors of the Pearl Oyster Pinctada margaritifera var. cumingii (Linnaeus 1758)
Source: MDPI journal article supplement (doi:10.3390/genes12030421), 2021-03-15

# Bilirubin

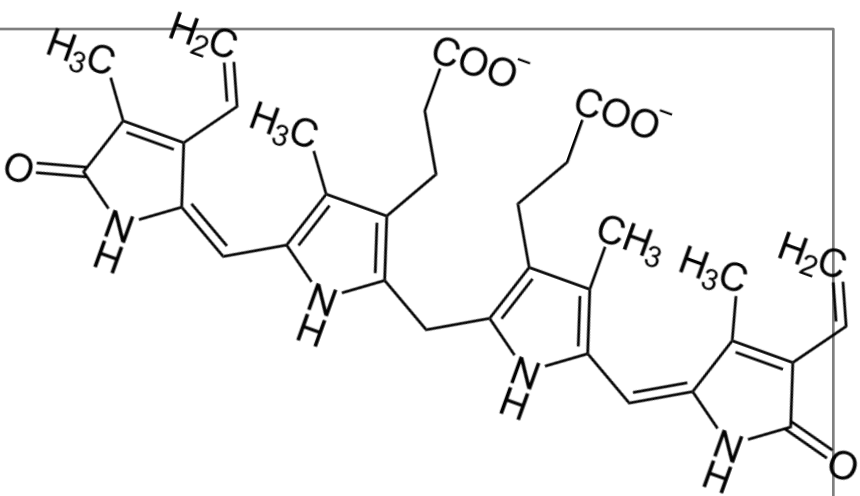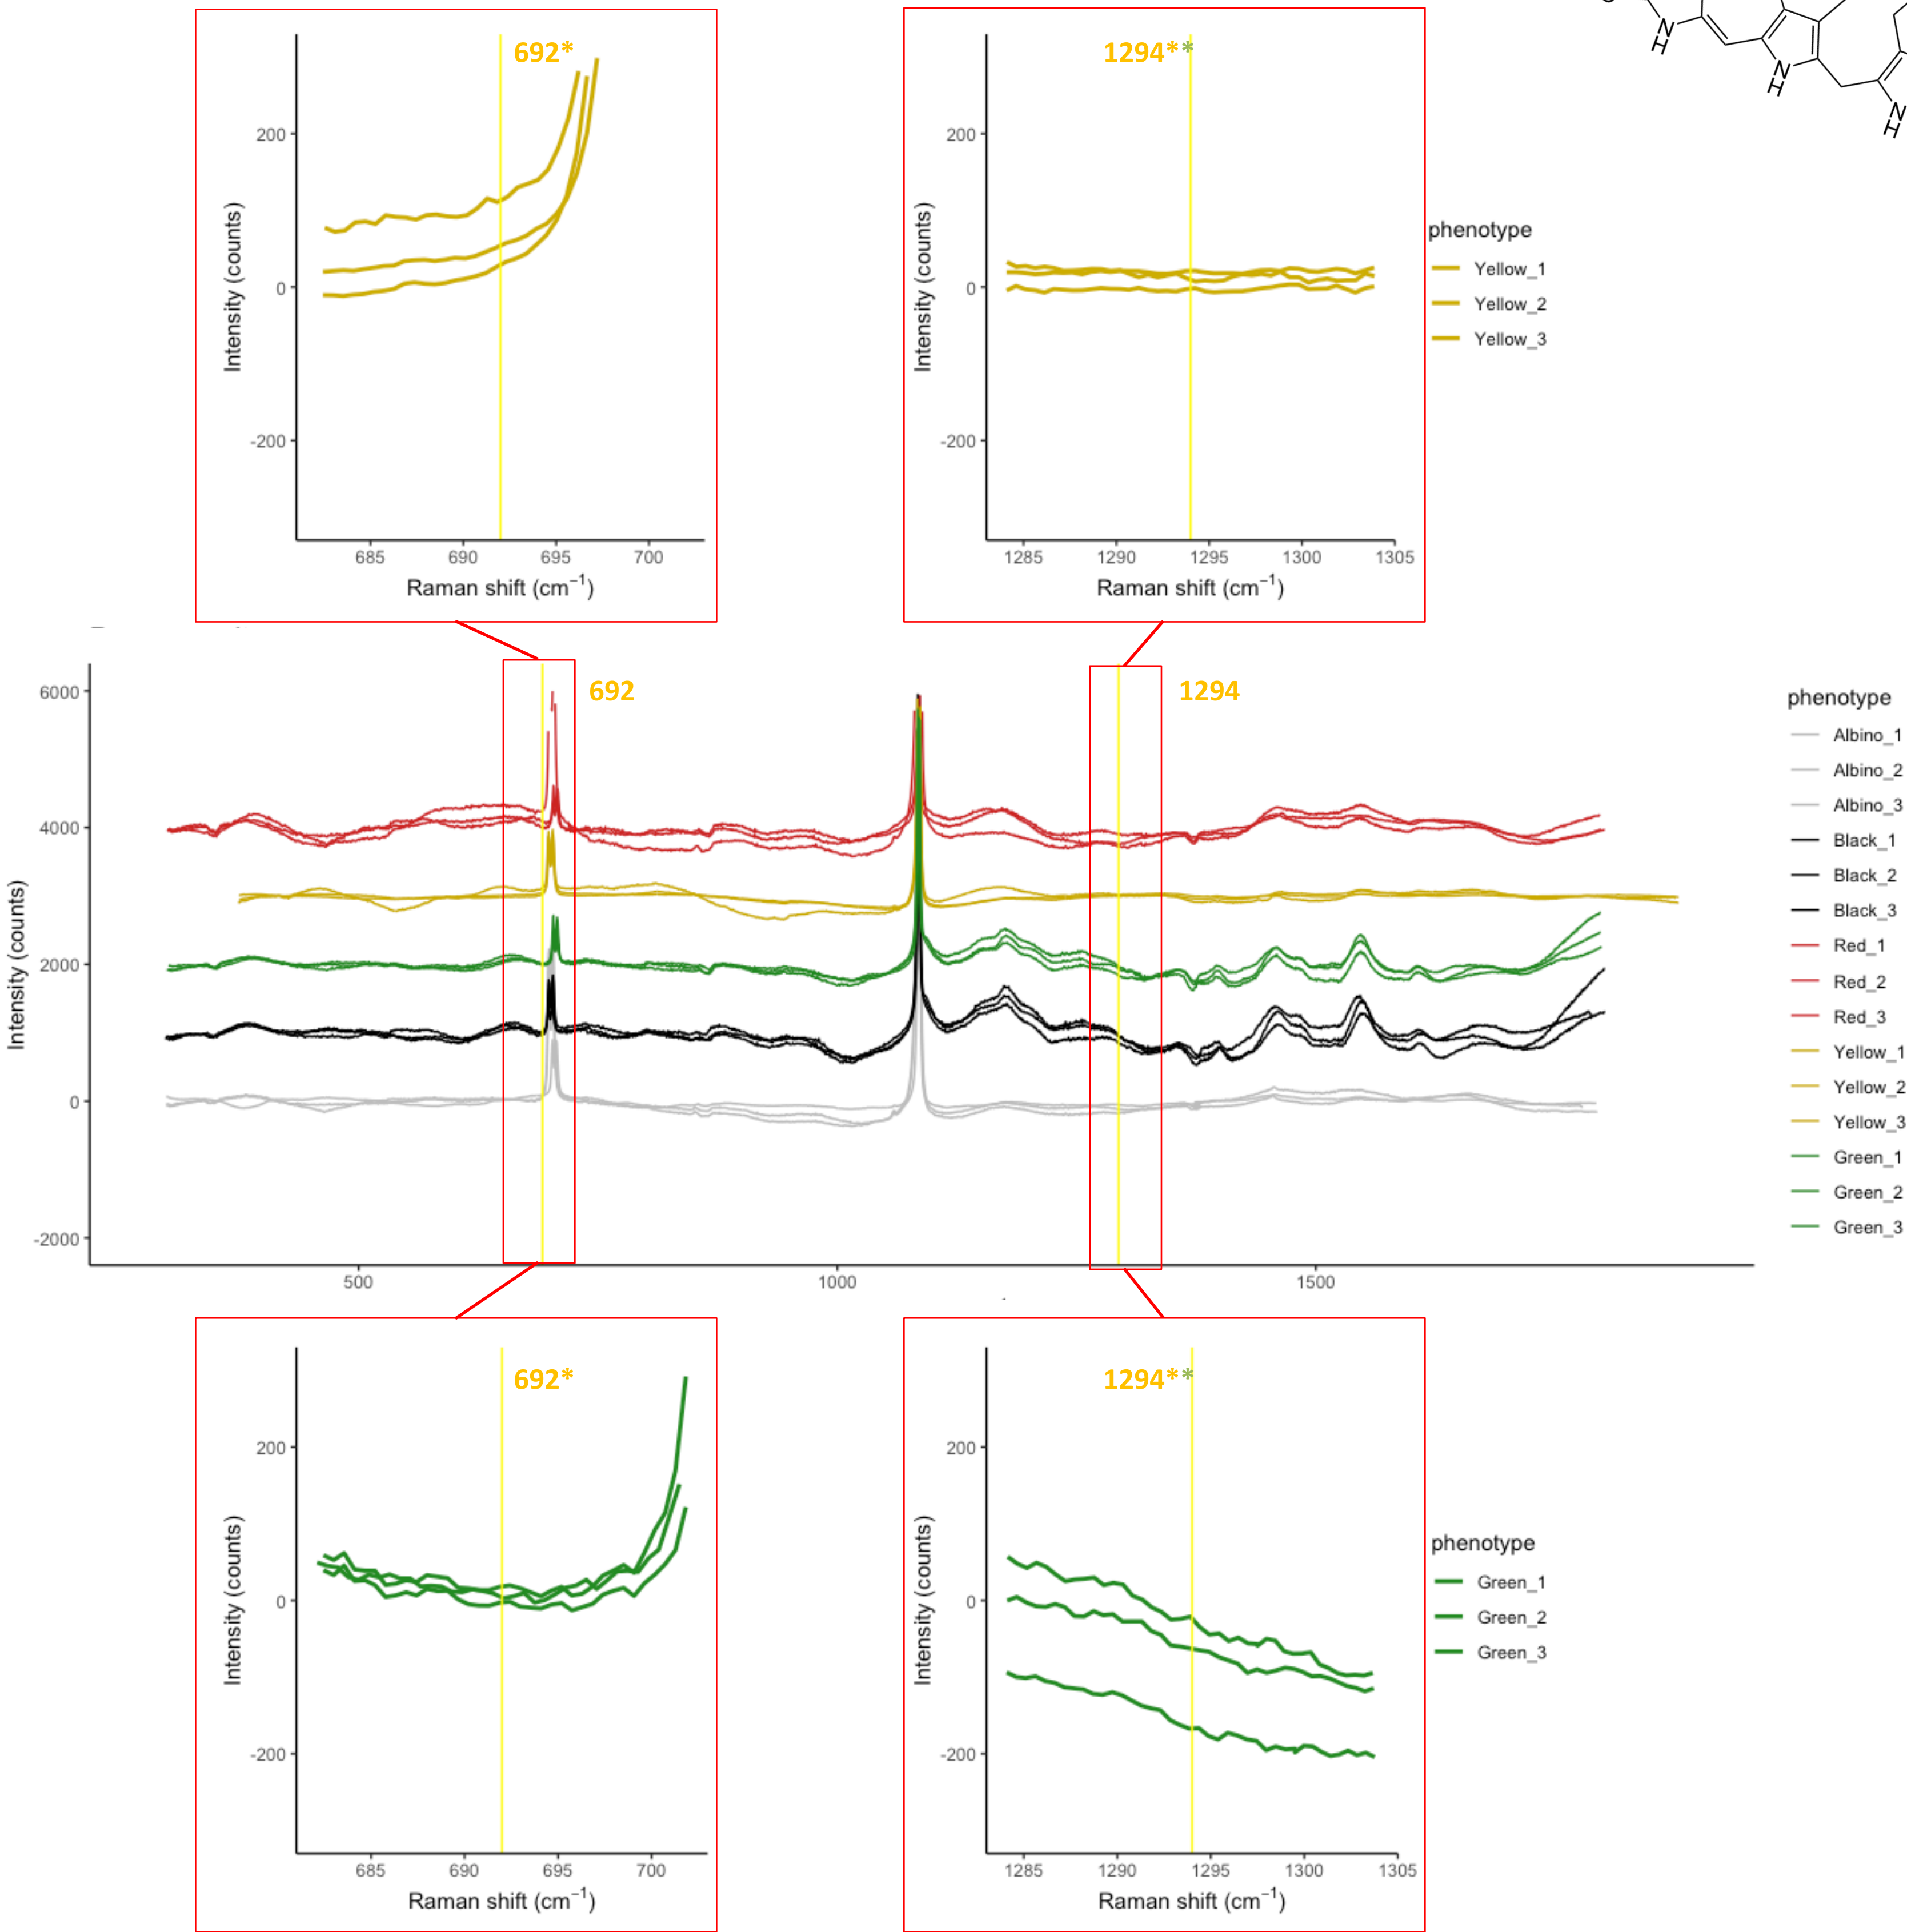

Supplement: s1 [file s1]

# FeIII-uroporphyrin

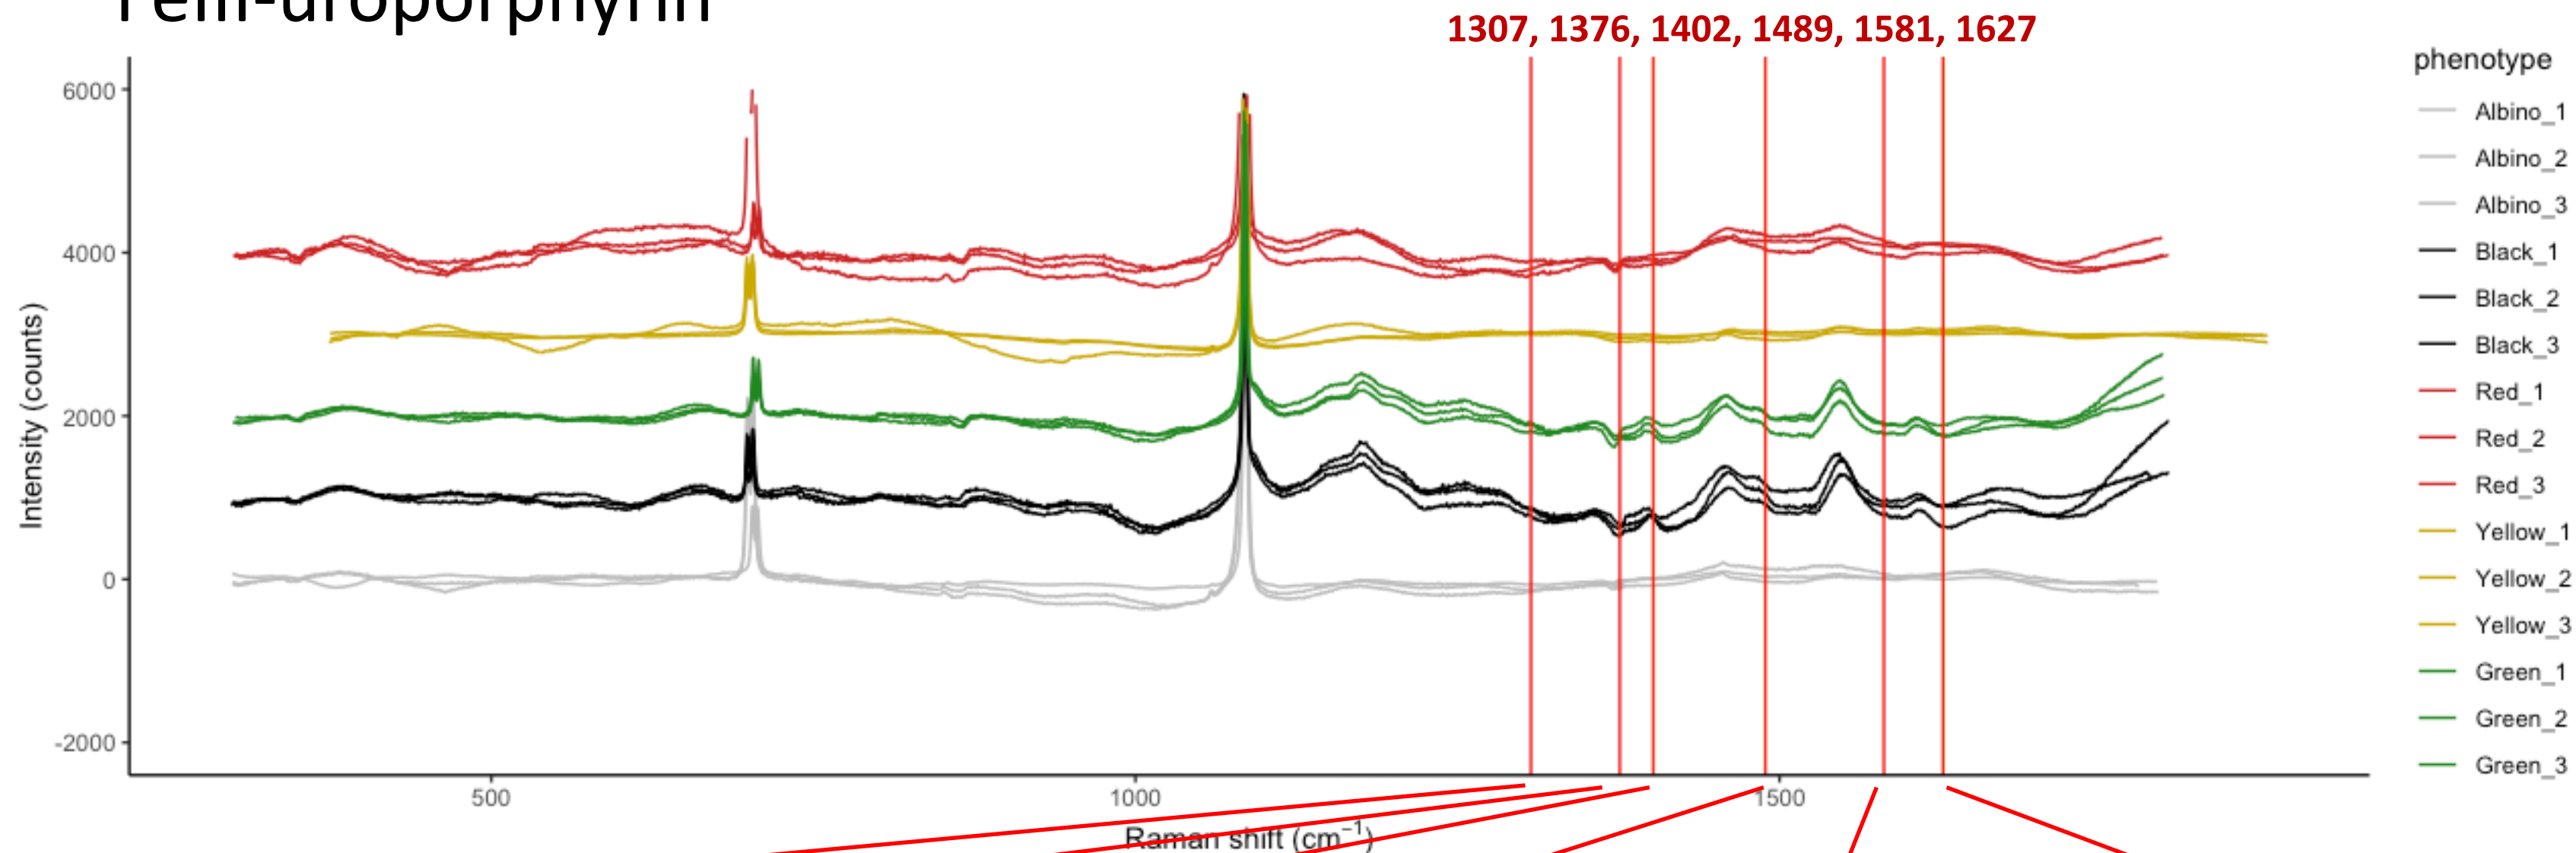

1307\*

1376\*\*

1402\*\*

1489\*\*

1581\*

1627\*

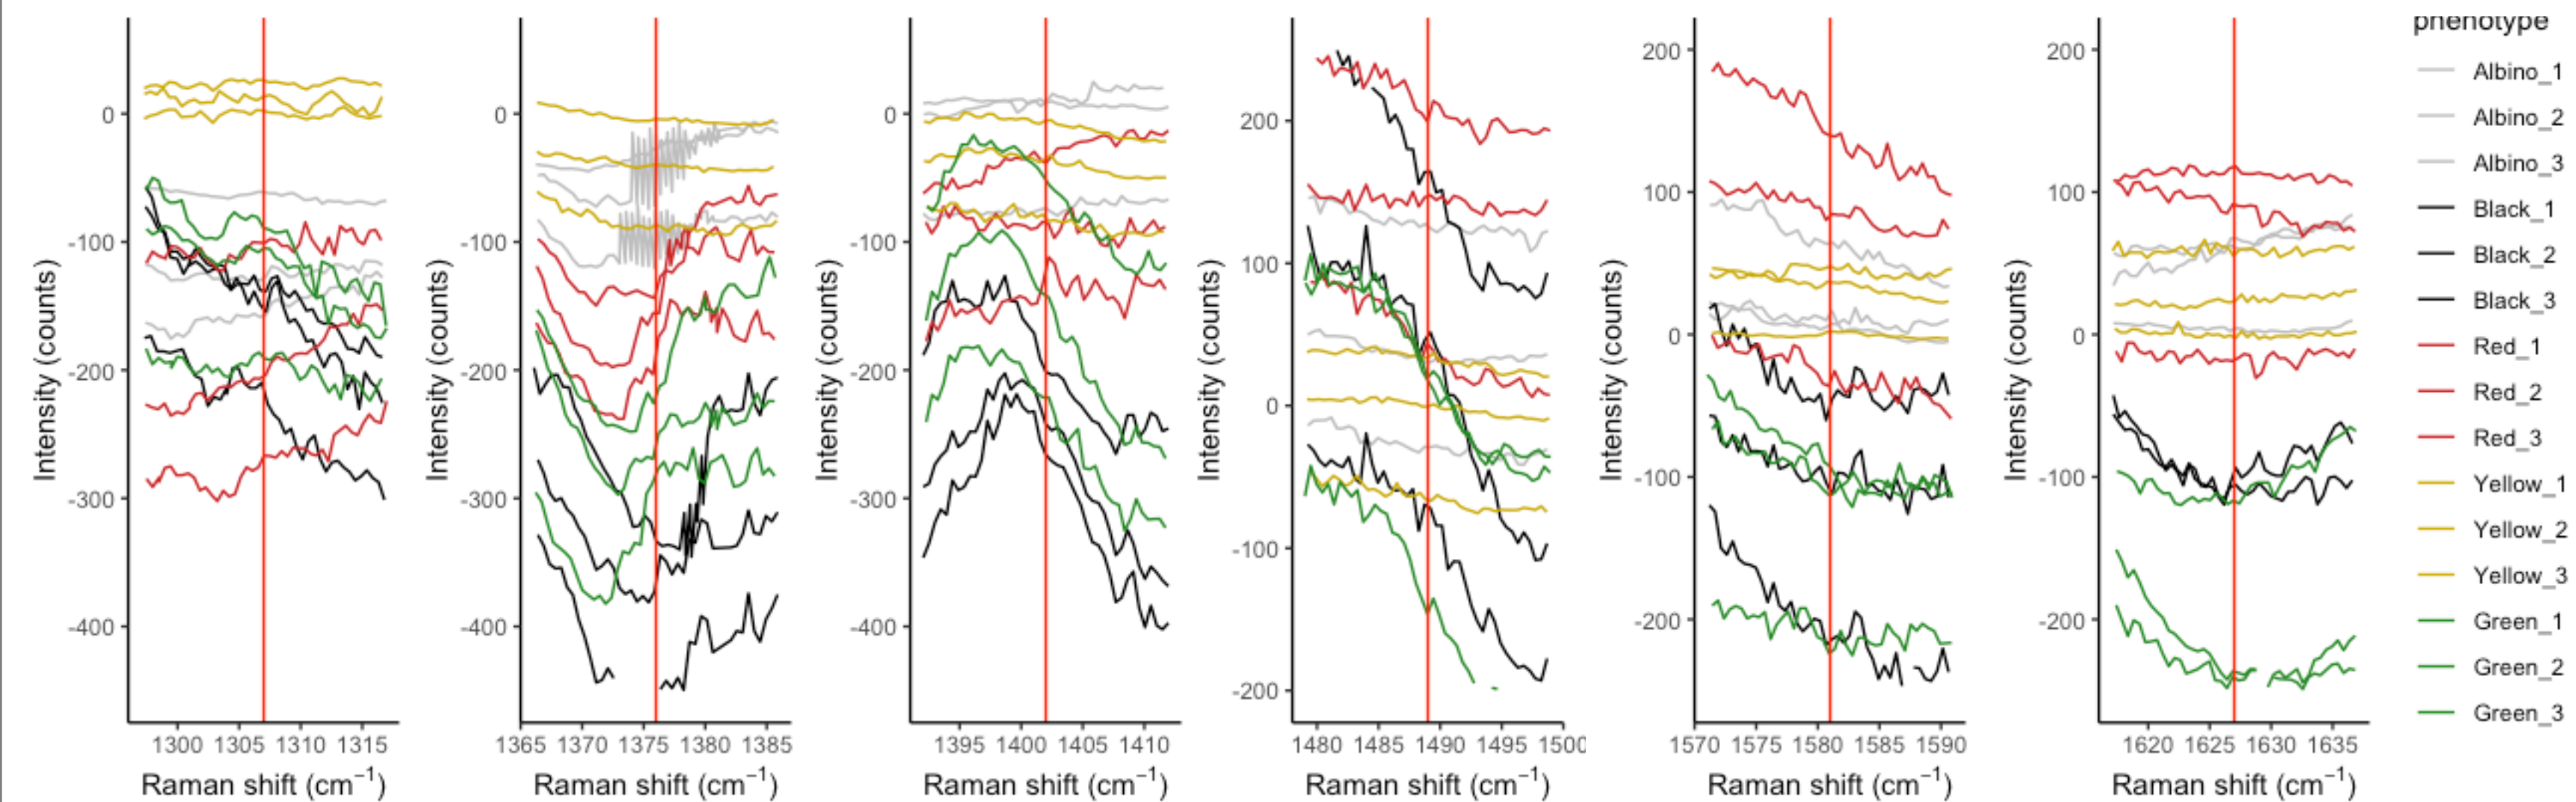

Supplement: s1 [file s1]

# Melanin

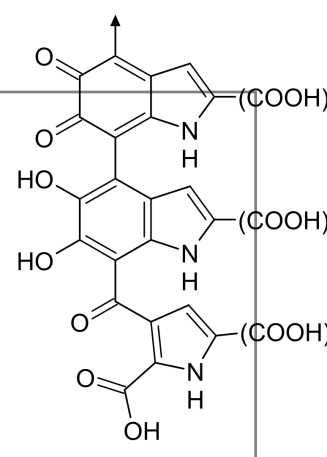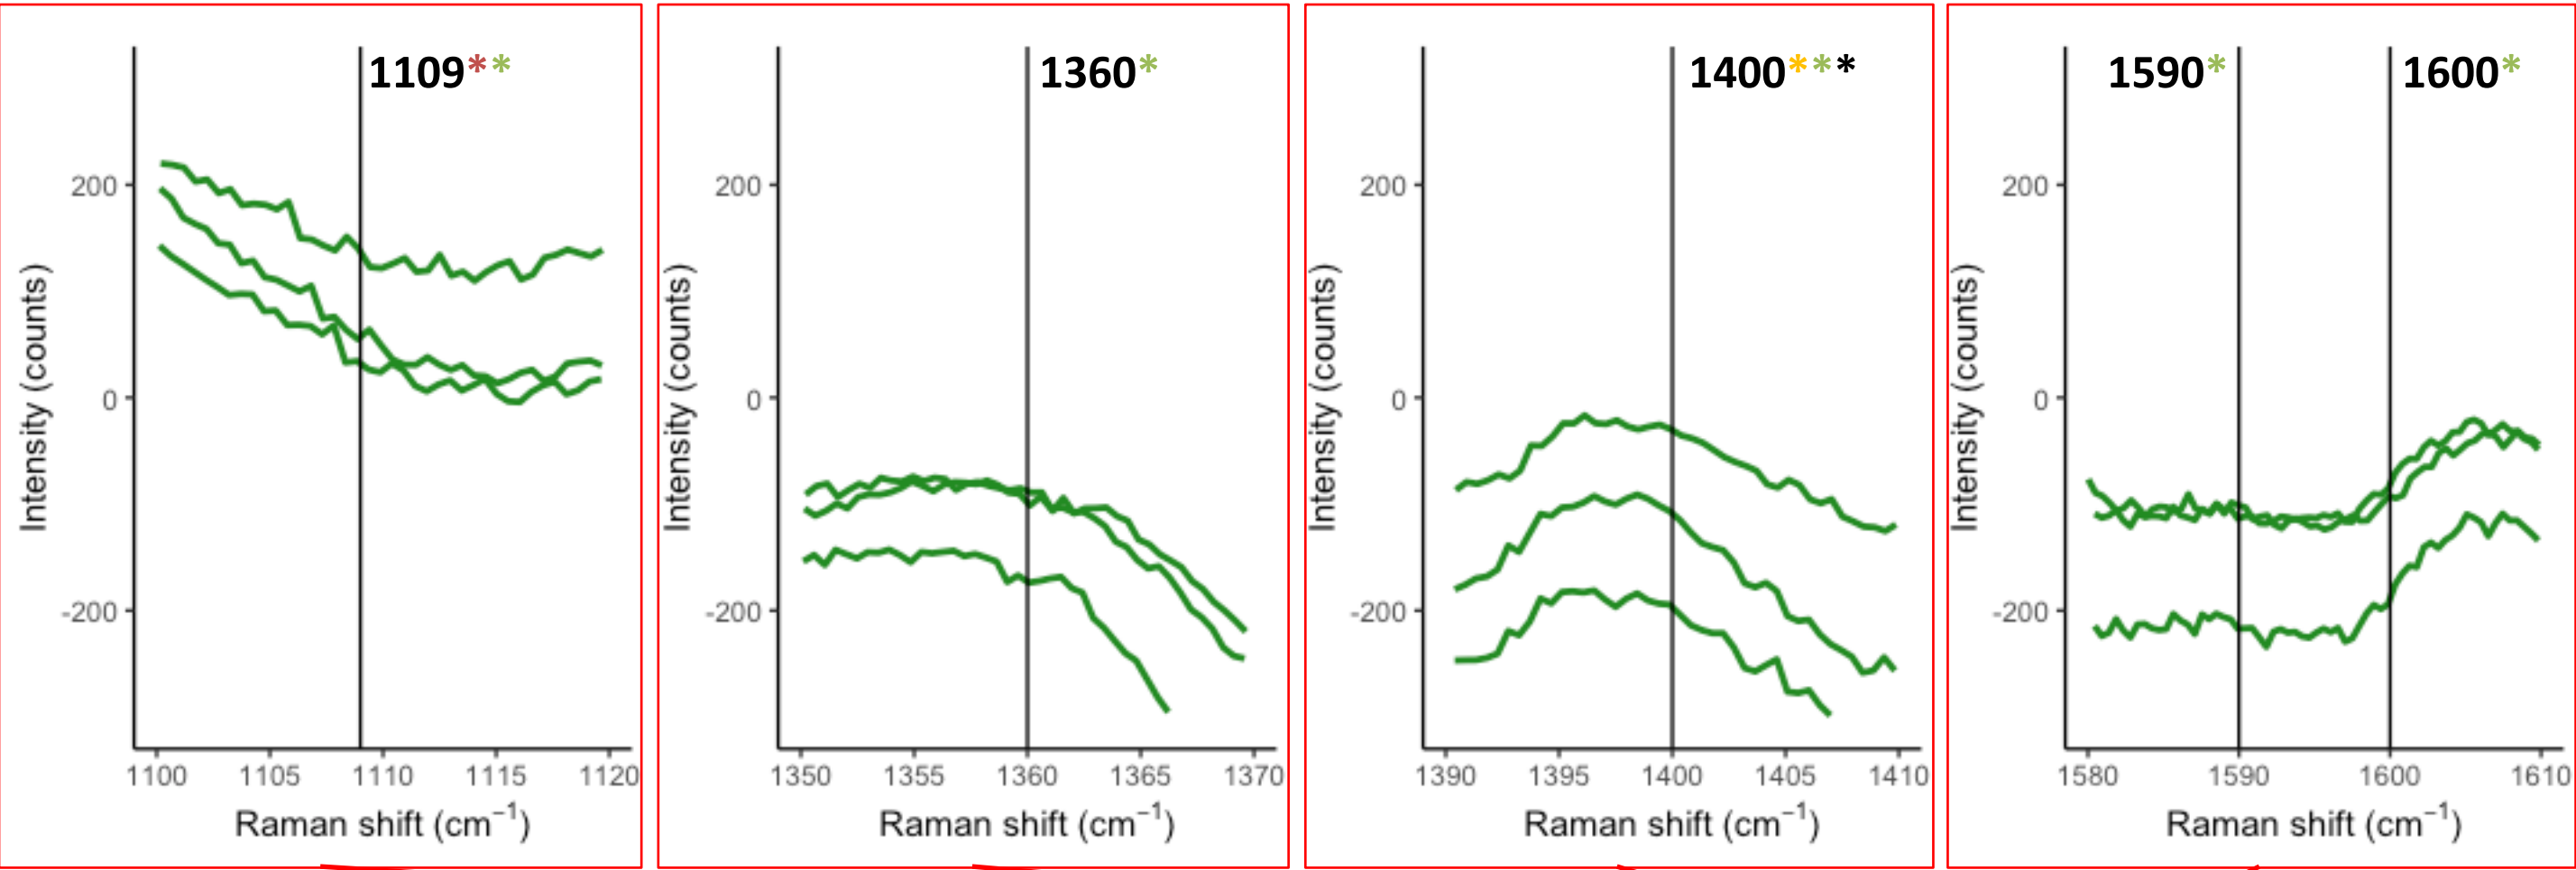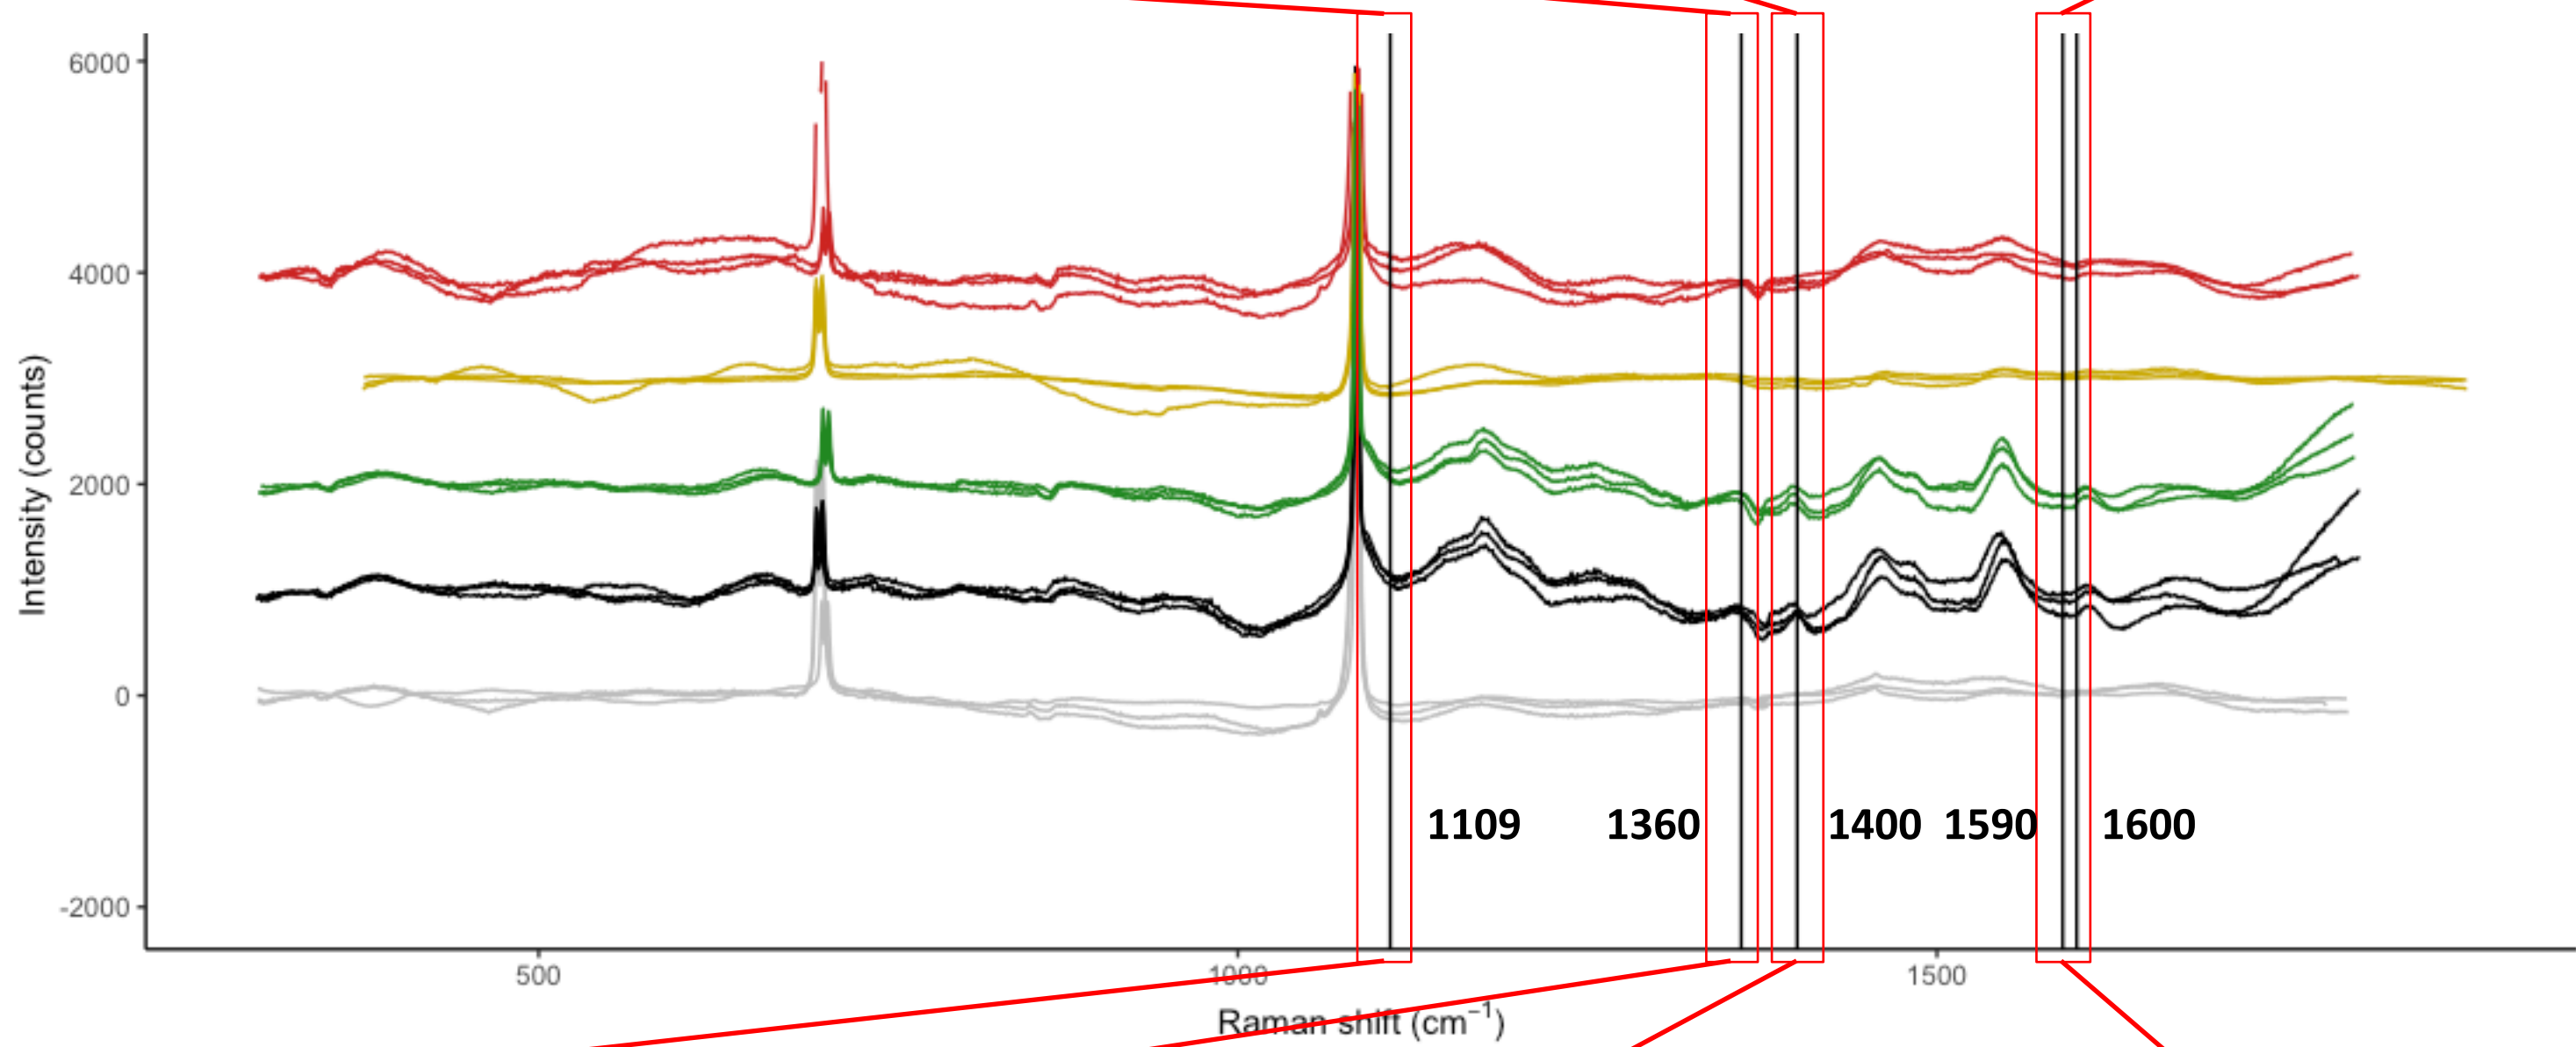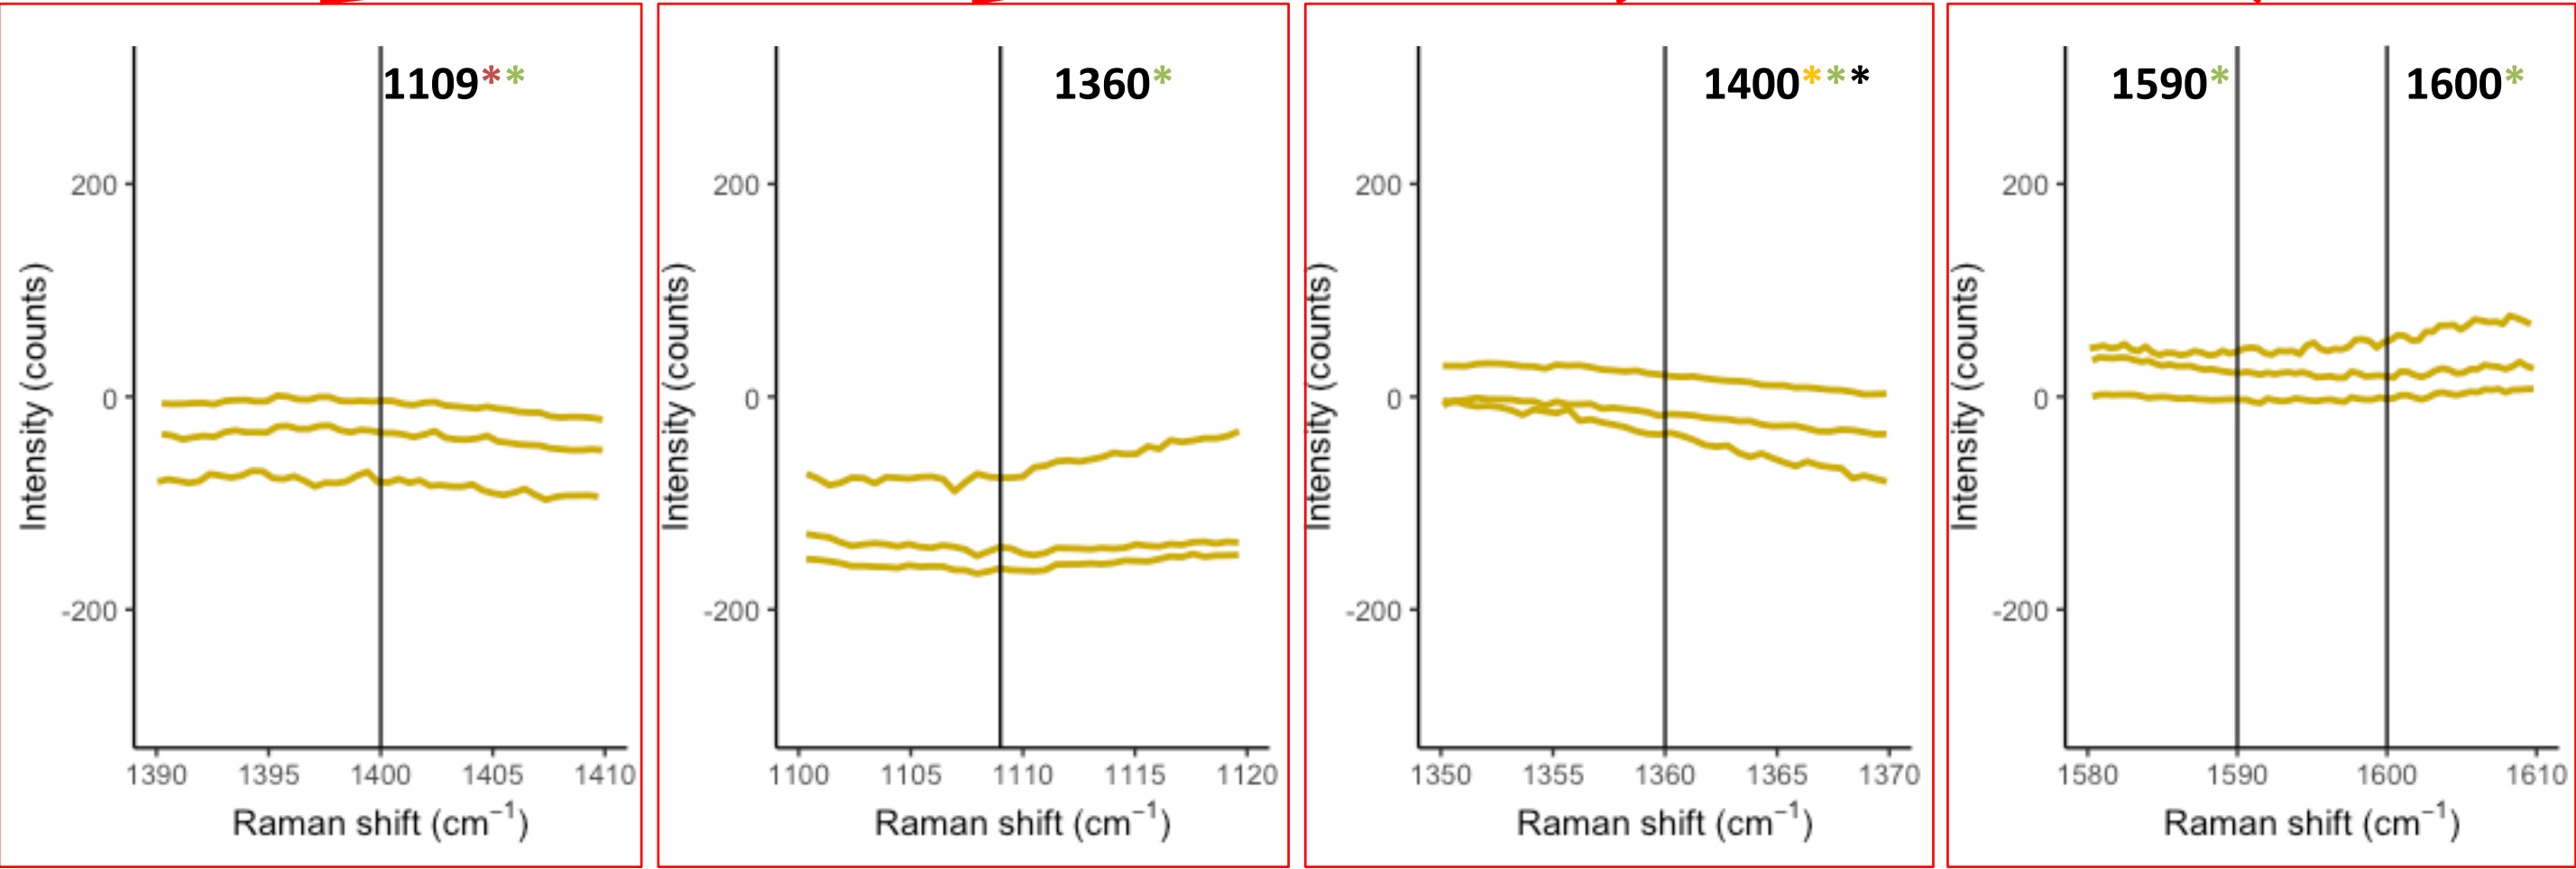

Supplement: s1 [file s1]

# Biliverdin

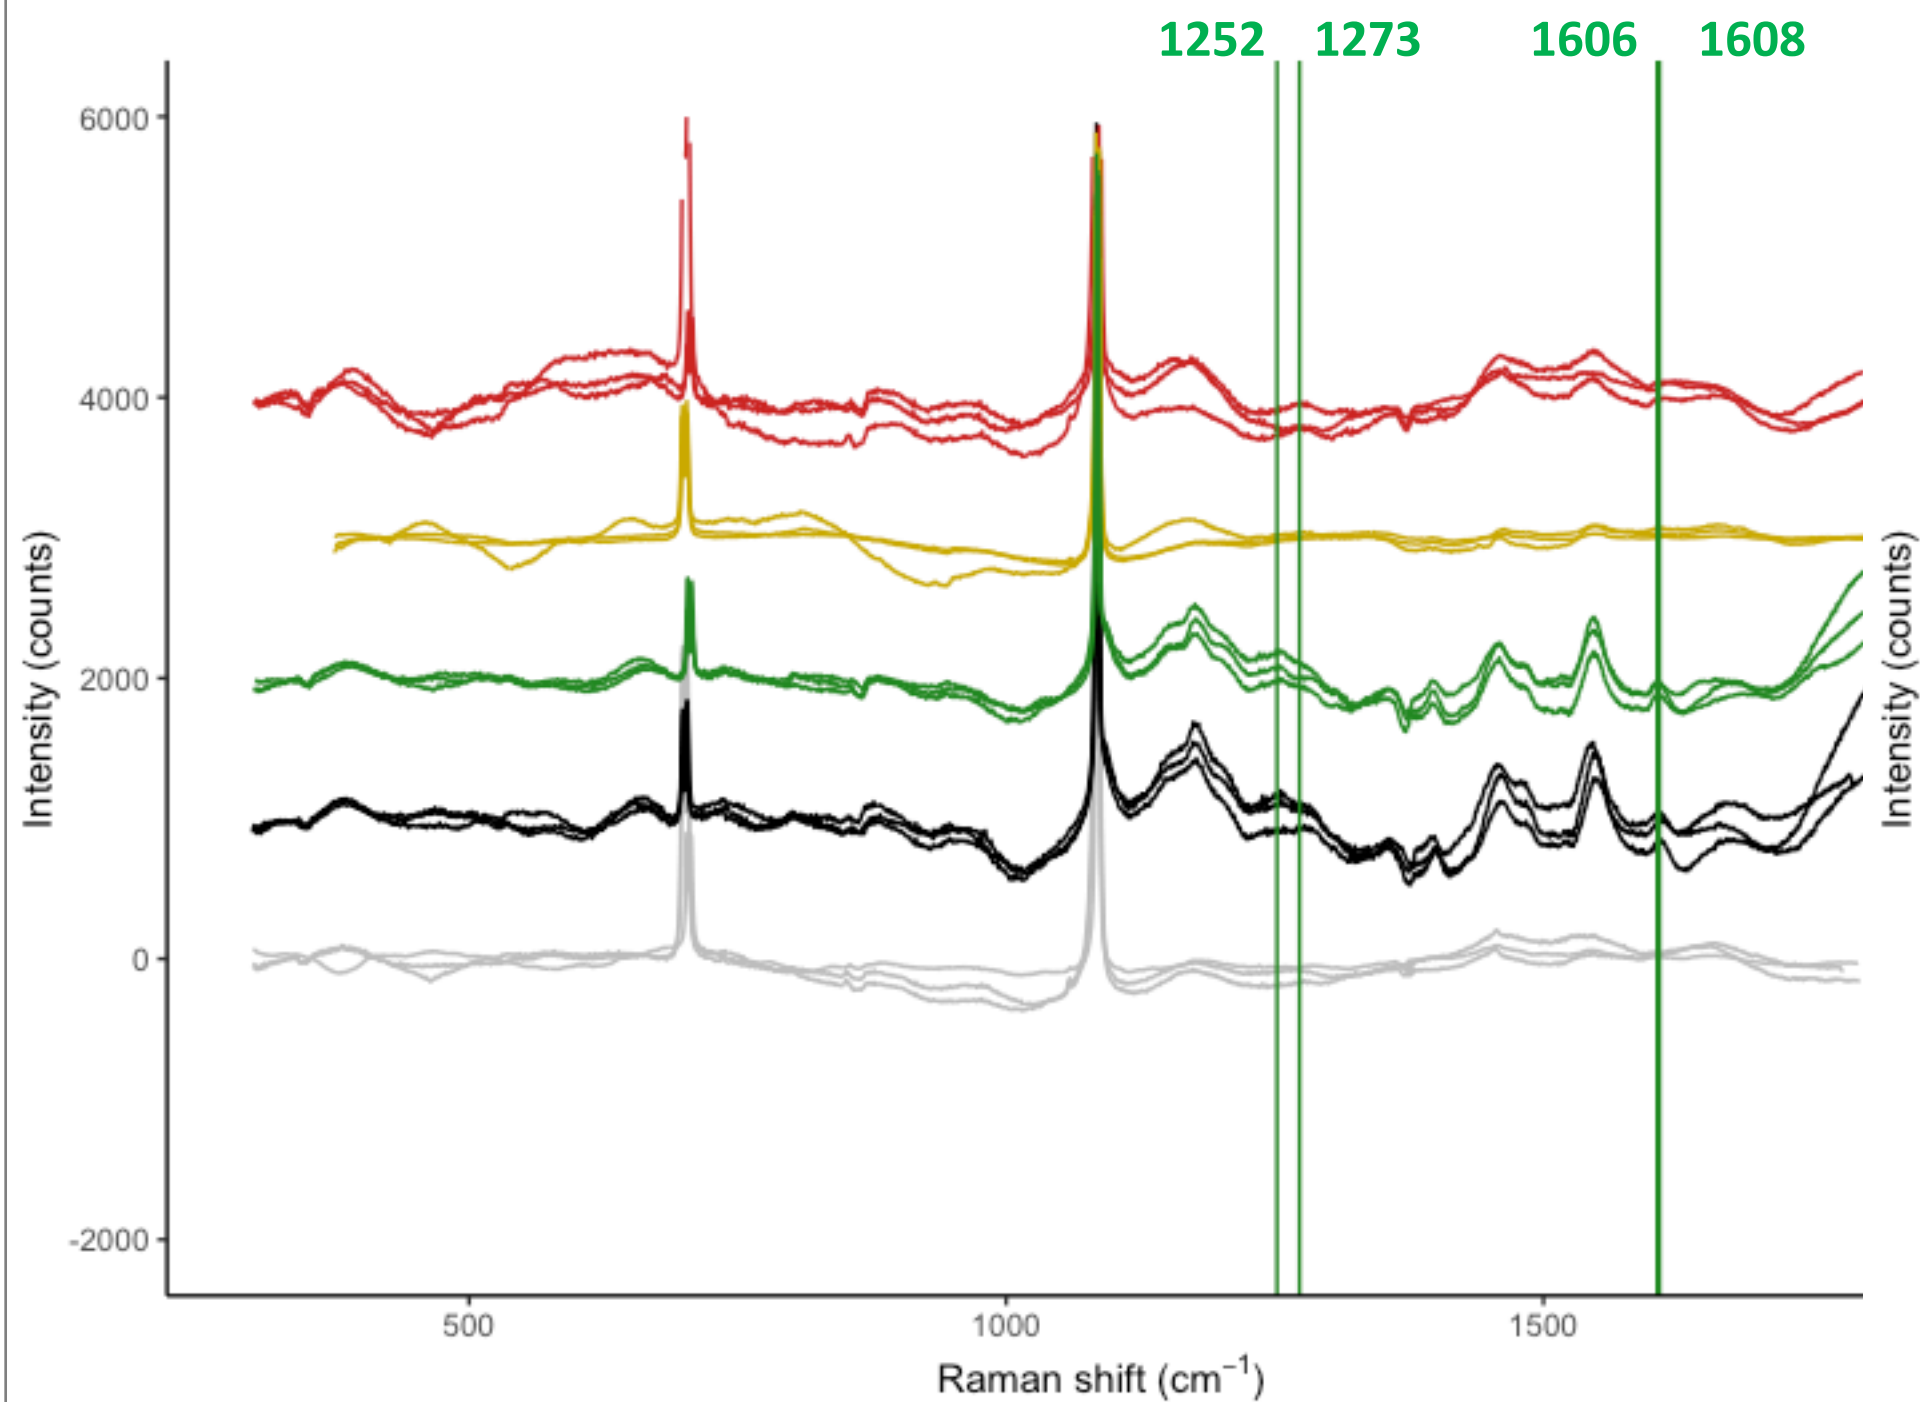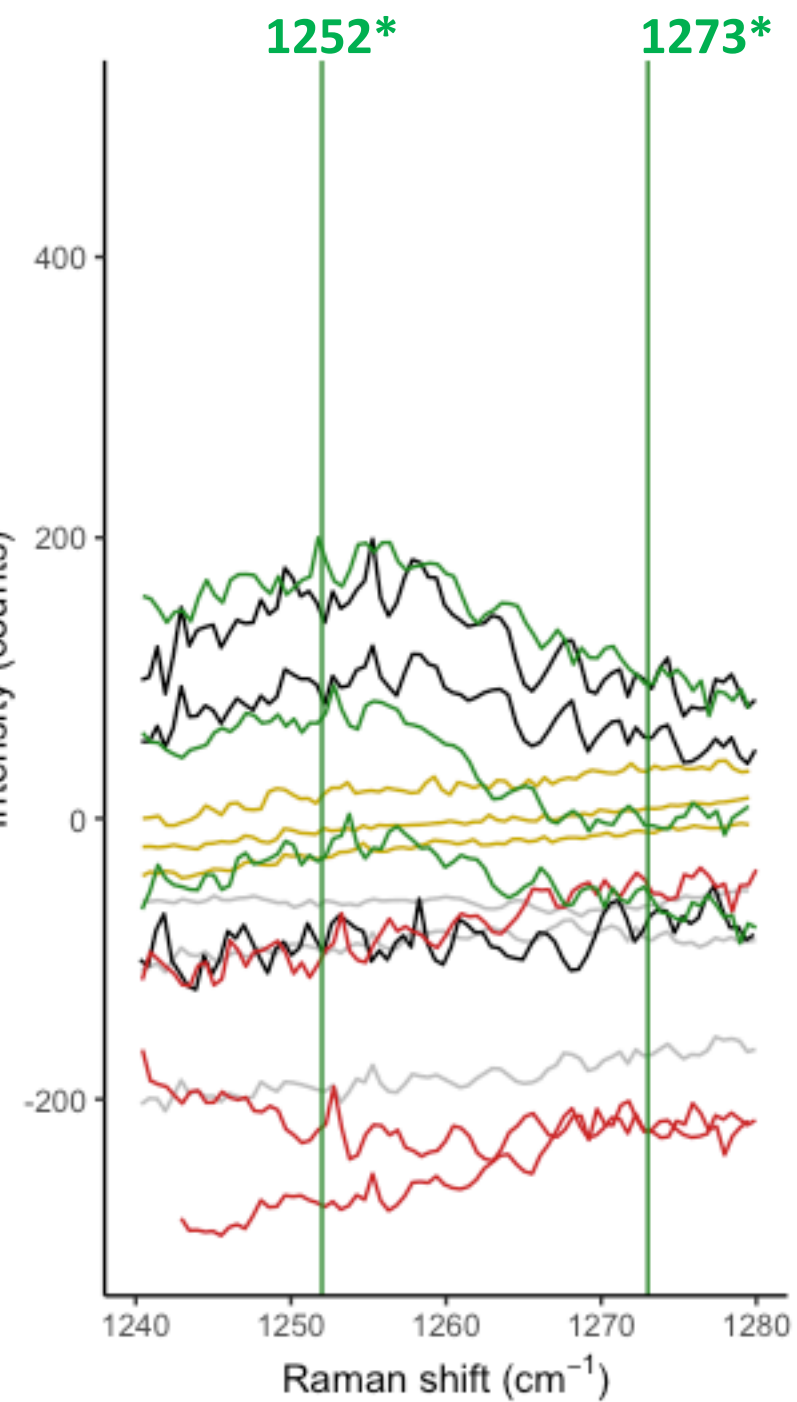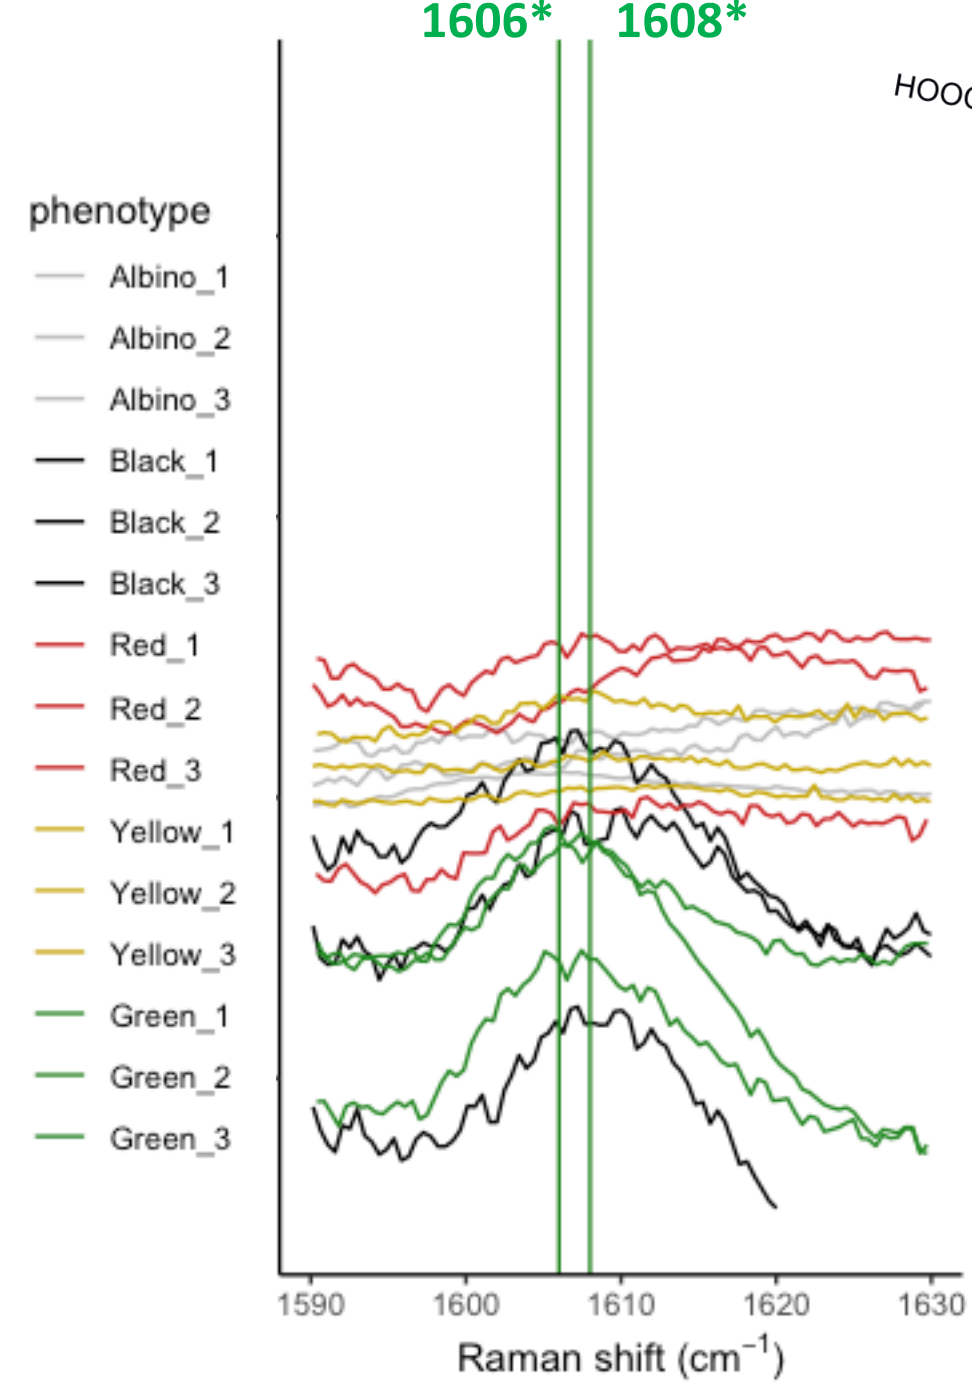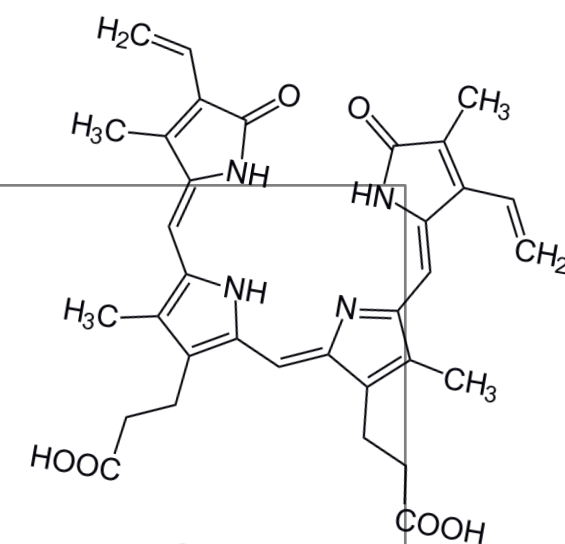

Supplement: s1 [file s1]

# Pheomelanin

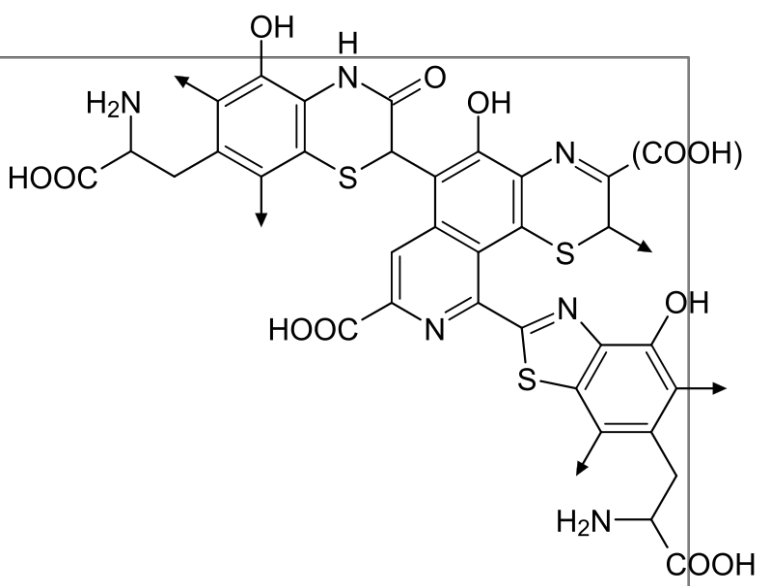

Supplement: s1 [file s1]

# Xanthine

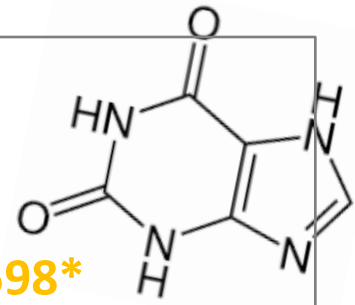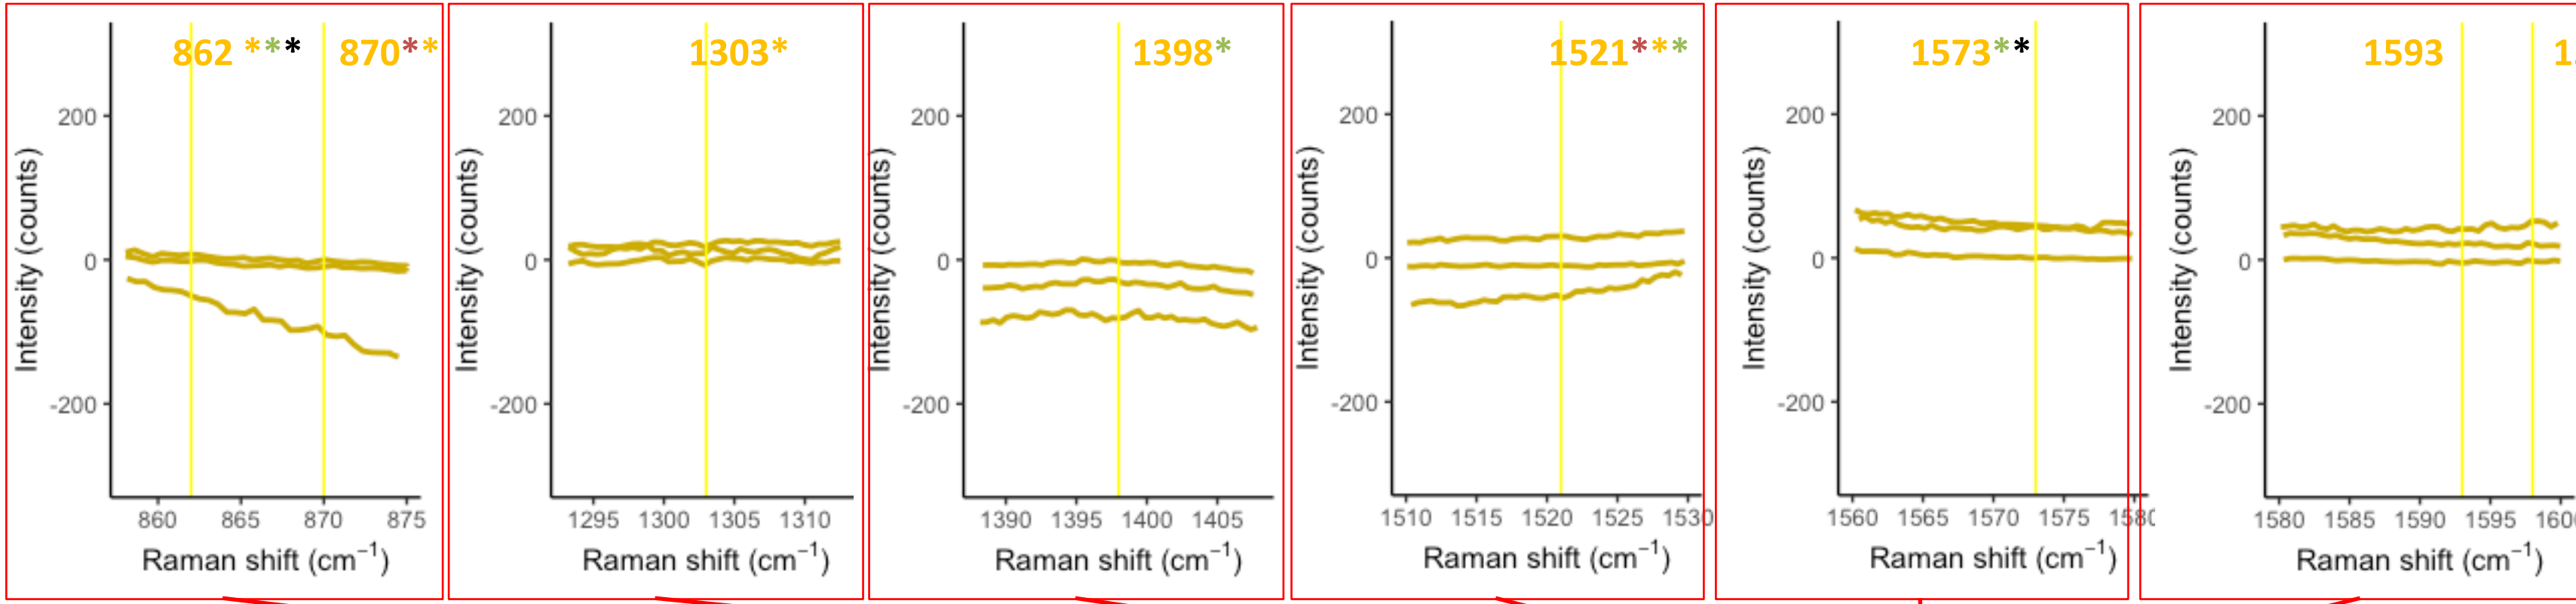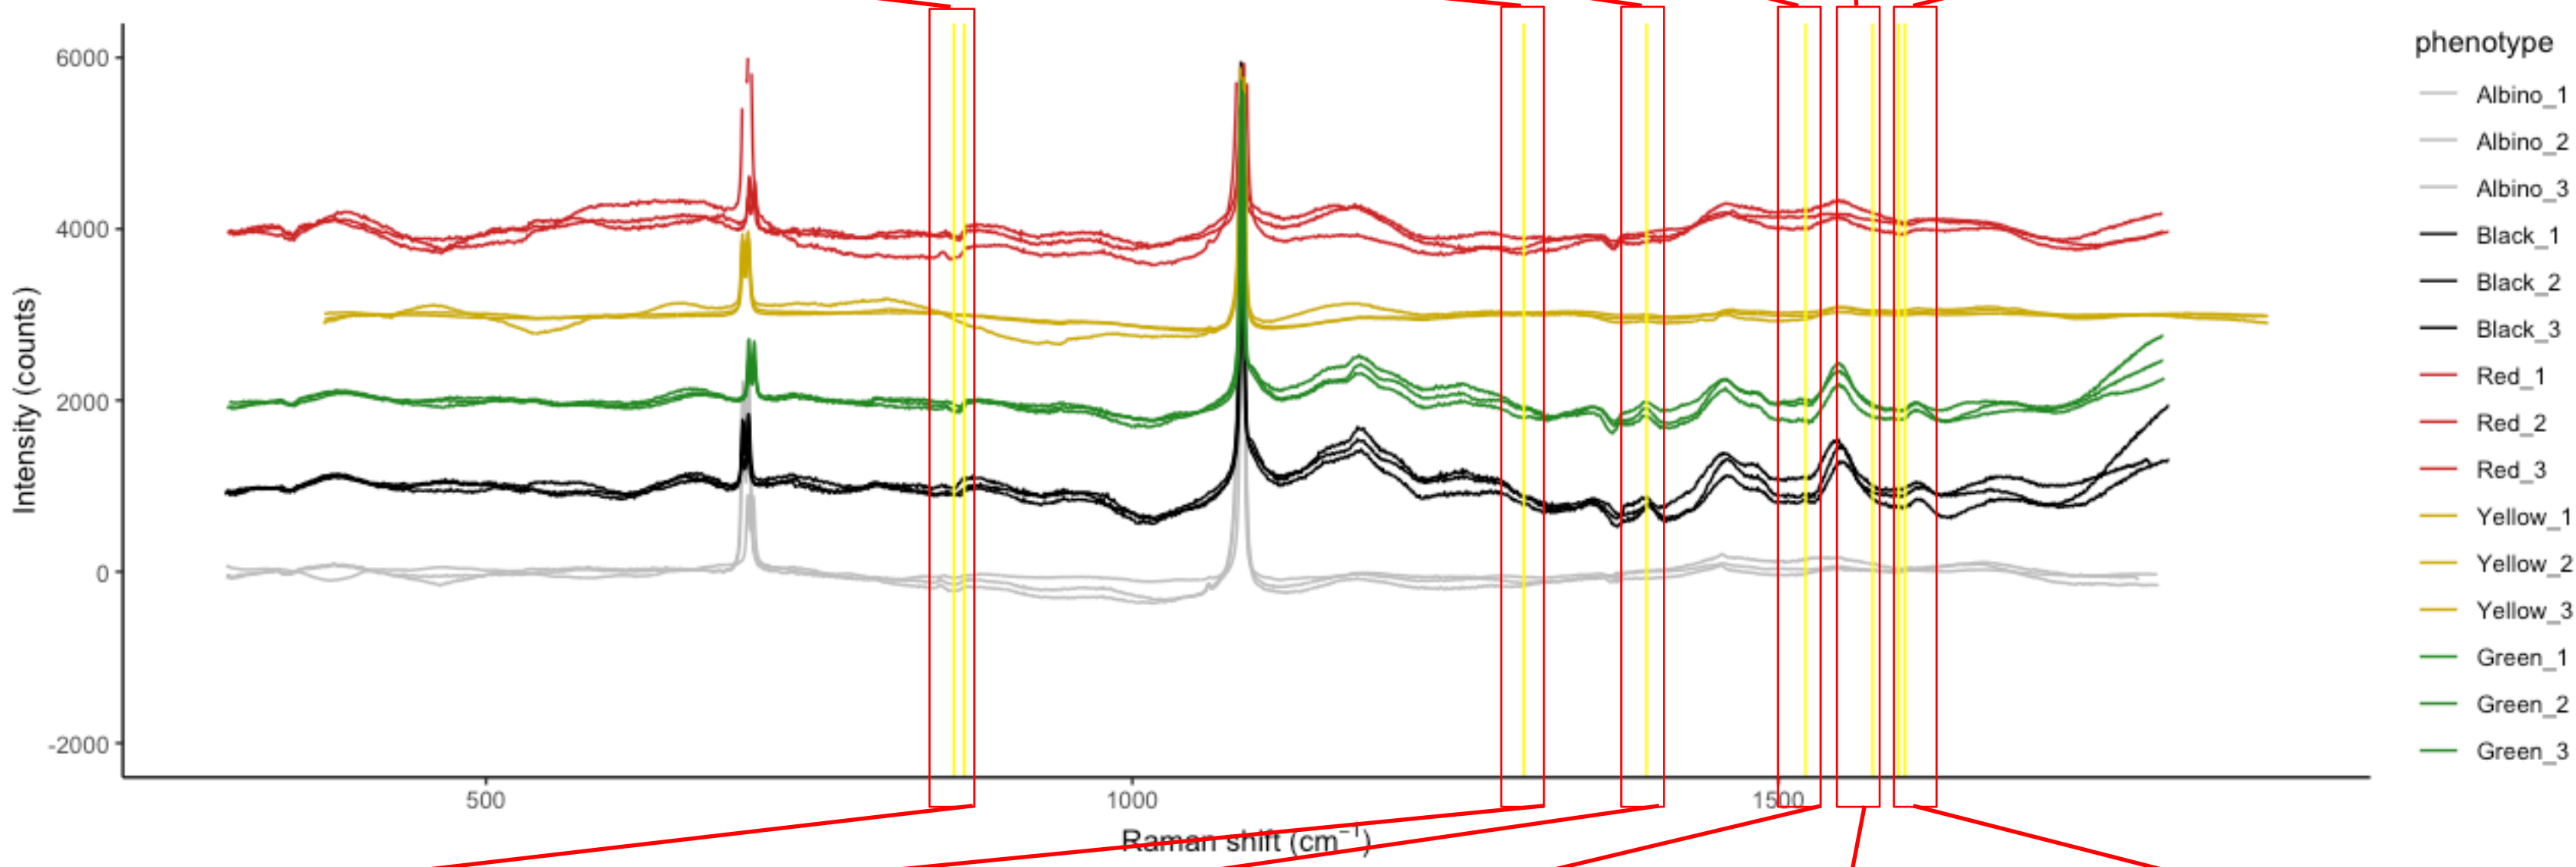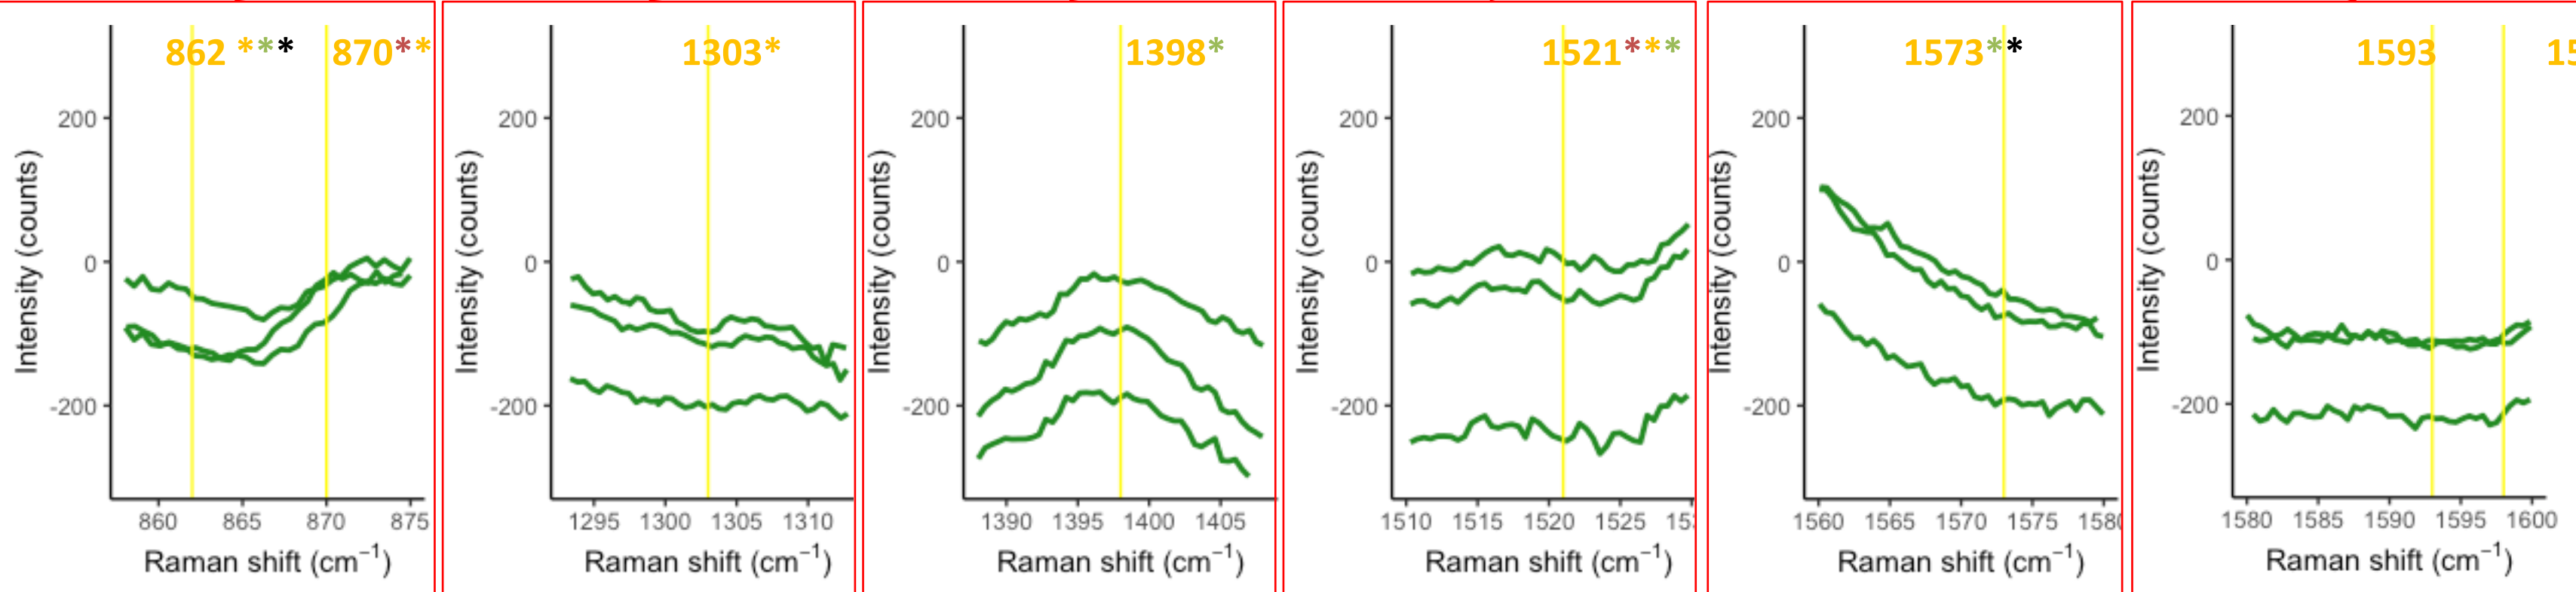

Supplement: s1 [file s1]
